1 **Gene expression imputation across multiple brain regions reveals schizophrenia risk**  
2 **throughout development.**

3

4 **Author List:**

5 Laura M. Huckins<sup>1,2</sup>, Amanda Dobbyn<sup>1,2</sup>, Douglas M. Ruderfer<sup>3</sup>, Gabriel Hoffman<sup>1,4</sup>, Weiqing  
6 Wang<sup>1,2</sup>, Antonio Pardinas<sup>5</sup> Veera M Rajagopal<sup>6,15,16</sup>, Thomas D. Als<sup>6,15,16</sup>, Hoang Nguyen<sup>1,2</sup>,  
7 Kiran Girdhar<sup>1,2</sup>, James Boocock<sup>7</sup>, Panos Roussos<sup>1,2</sup>, Menachem Fromer<sup>1,2</sup>, Robin Kramer<sup>8</sup>,  
8 Enrico Domencini<sup>9</sup>, Eric Gamazon<sup>3,14</sup>, Shaun Purcell<sup>1,2,4</sup>, CommonMind Consortium, the  
9 Schizophrenia Working Group of the Psychiatric Genomics Consortium, iPSYCH-GEMS  
10 Schizophrenia Working Group, Ditte Demontis<sup>6,15,16</sup>, Anders D. Børglum<sup>6,15,16</sup>, James Walters<sup>5</sup>,  
11 Michael O'Donovan<sup>5</sup>, Patrick Sullivan<sup>10,11</sup>, Michael Owen<sup>5</sup>, Bernie Devlin<sup>12</sup>, Solveig K.  
12 Sieberts<sup>13</sup>, Nancy Cox<sup>3,14</sup>, Hae Kyung Im<sup>14</sup>, Pamela Sklar<sup>1,2,4</sup>, Eli A. Stahl<sup>1,2</sup>

13

14

15 **Author Affiliations:**

- 16 1. Division of Psychiatric Genomic, Icahn School of Medicine at Mount Sinai, NYC, NY;  
17 2. Department of Genetics and Genomics, Icahn School of Medicine at Mount Sinai, NYC, NY;  
18 3. Vanderbilt University Medical Center, Nashville, TN;  
19 4. Icahn Institute for Genomics and Multiscale Biology, Icahn School of Medicine at Mount  
20 Sinai, NYC, NY, USA;  
21 5. MRC Centre for Neuropsychiatric Genetics and Genomics, Cardiff University, UK;  
22 6. Department of Biomedicine, Aarhus University, Aarhus, Denmark  
23 7. Department of Human Genetics, David Geffen School of Medicine, University of California  
24 Los Angeles, Los Angeles, CA, USA;  
25 8. Human Brain Collection Core, National Institute of Mental Health, Bethesda, MD, USA;  
26 9. Laboratory of Neurogenomic Biomarkers, Centre for Integrative Biology (CIBIO),  
27 University of Trento, Trento, Italy;  
28 10. University of North Carolina at Chapel Hill, NC, USA  
29 11. Karolinska Institutet, Stockholm, Sweden  
30 12. Department of Psychiatry, University of Pittsburgh, Pittsburgh, PA, USA;  
31 13. Systems Biology, Sage Bionetworks, Seattle, WA, USA;  
32 14. Section of Genetic Medicine, Department of Medicine, University of Chicago, Chicago,  
33 Illinois, USA  
34 15. The Lundbeck Foundation Initiative for Integrative Psychiatric Research, iPSYCH,  
35 Denmark.  
36 16. Center for Integrative Sequencing, Aarhus University, Aarhus, Denmark.

37

38

39 **Abstract**

40 Transcriptomic imputation approaches offer an opportunity to test associations between disease  
41 and gene expression in otherwise inaccessible tissues, such as brain, by combining eQTL  
42 reference panels with large-scale genotype data. These genic associations could elucidate signals  
43 in complex GWAS loci and may disentangle the role of different tissues in disease development.  
44 Here, we use the largest eQTL reference panel for the dorso-lateral pre-frontal cortex (DLPFC),  
45 collected by the CommonMind Consortium, to create a set of gene expression predictors and  
46 demonstrate their utility. We applied these predictors to 40,299 schizophrenia cases and 65,264  
47 matched controls, constituting the largest transcriptomic imputation study of schizophrenia to  
48 date. We also computed predicted gene expression levels for 12 additional brain regions, using  
49 publicly available predictor models from GTEx. We identified 413 genic associations across 13  
50 brain regions. Stepwise conditioning across the genes and tissues identified 71 associated genes  
51 (67 outside the MHC), with the majority of associations found in the DLPFC, and of which  
52 14/67 genes did not fall within previously genome-wide significant loci. We identified 36  
53 significantly enriched pathways, including hexosaminidase-A deficiency, and multiple pathways  
54 associated with porphyric disorders. We investigated developmental expression patterns for all  
55 67 non-MHC associated genes using BRAINSPAN, and identified groups of genes expressed  
56 specifically pre-natally or post-natally.

57

## 58 **Introduction**

59 Genome-wide association studies (GWAS) have yielded large lists of disease-associated loci.  
60 Despite this, progress in identifying the causal variants driving these associations, particularly for  
61 complex psychiatric disorders such as schizophrenia, has lagged much further behind.  
62 Interpreting associated variants and loci is therefore vital to understanding how genetic variation  
63 contributes to disease pathology. Expression Quantitative Trait Loci (eQTLs), which are  
64 responsible for a substantial proportion of gene expression variance, have been posited as a  
65 potential link between associated loci and disease susceptibility<sup>1-5</sup>, and indeed have yielded  
66 results for a host of complex traits<sup>6-9</sup>. Consequently, numerous methods to identify and interpret  
67 co-localisation of eQTLs and GWAS loci have been developed<sup>10-13</sup>. However, these methods  
68 require simplifying assumptions about genetic architecture (i.e., one causal variant per GWAS  
69 locus) and/or linkage disequilibrium, may be underpowered or overly conservative, especially in  
70 the presence of allelic heterogeneity, and have not yet yielded substantial insights into existing or  
71 novel loci.

72  
73 Biologically relevant information can be extracted by transcriptomic investigations, as recently  
74 described by the CommonMind Consortium<sup>14</sup> (CMC), thanks to detailed RNA-sequencing in a  
75 large cohort of genotyped individuals with schizophrenia and bipolar disorder<sup>14</sup>. These analyses  
76 however are underpowered to detect with statistical confidence differential expression of genes  
77 mapping at schizophrenia (SCZ) risk loci, due to the small effects predicted by GWAS combined  
78 with the difficulty of obtaining adequate sample sizes of neurological tissues<sup>14</sup>. Still, such  
79 methods do not necessarily identify all risk variation in GWAS loci. Transcriptomic imputation  
80 is an alternative approach that leverages large eQTL reference panels to bridge the gap between  
81 large-scale genotyping studies and biologically useful transcriptome studies<sup>15,16</sup>. This approach  
82 seeks to identify and codify the relationships between genotype and gene expression in matched  
83 panels of individuals, then impute the genetic component of the transcriptome into large-scale  
84 genotype-only datasets, such as case-control GWAS cohorts, which enables investigation of  
85 disease-associated gene expression changes. This will allow us to study genes with modest effect  
86 sizes, likely representing a large proportion of genomic risk for psychiatric disorders<sup>14,17</sup>.

87

88 The access to the large collection of dorso-lateral pre-frontal cortex (DLPFC) gene expression  
89 data collected by the CommonMind Consortium<sup>14</sup> affords us a unique opportunity to study and  
90 codify relationships between genotype and gene expression. Here, we present a novel set of gene  
91 expression predictor models, built using CommonMind Consortium DLPFC data<sup>14</sup>. We compare  
92 different regression approaches to building these models (including elastic net<sup>15</sup>, Bayesian sparse  
93 linear mixed models and ridge regression<sup>16</sup>, and using max eQTLs), and benchmark performance  
94 of these predictors against existing GTEx prediction models. We applied our CMC DLPFC  
95 predictors and 12 GTEx-derived neurological prediction models to predict gene expression in  
96 schizophrenia GWAS data, obtained through collaboration with the Psychiatric Genomics  
97 Consortium (PGC) schizophrenia working group, the “CLOZUK2” cohort, and the iPSYCH-  
98 GEMS schizophrenia working group. We identified 413 genome-wide significant genic  
99 associations with schizophrenia in our PGC+CLOZUK2 sample, constituting 67 independent  
100 associations outside the MHC region. We demonstrate the relevance of these associations to  
101 schizophrenia aetiopathology using gene set enrichment analysis, and by examining the effects  
102 of manipulation of these genes in mouse models. Finally, we investigated spatio-temporal  
103 expression of these genes using a developmental transcriptome dataset, and identified distinct  
104 spatio-temporal patterns of expression across our associated genes.

105  
106  
107  
108  
109  
110  
111  
112

## 113 **Results**

### 114 **Prediction Models based on CommonMind Consortium DLPFC expression**

115 Using matched genotype and gene expression data from the CommonMind Consortium Project,  
116 we developed DLPFC genetically regulated gene expression (GREX) prediction models. We  
117 systematically compared four approaches to building predictors<sup>15,16</sup> within a cross-validation  
118 framework. Elastic net regression had a higher distribution of cross-validation  $R^2$  ( $R_{cv}^2$ ) and  
119 higher mean  $R_{cv}^2$  values (Supplementary Figures 1, 2A) than all other methods. We therefore  
120 used elastic net regression to build our prediction models. We compared prediction models  
121 created using elastic net regression on SVA-corrected and uncorrected data<sup>14</sup>. The distribution of  
122  $R_{cv}^2$  values for the SVA-based models was significantly higher than for the un-corrected data<sup>14,18</sup>  
123 (ks-test;  $p < 2.2e-16$ ; Supplementary figure 1B-C). In total, 10,929 genes were predicted with  
124 elastic net cross-validation  $R_{cv}^2 > 0.01$  in the SVA-corrected data and were included in the final  
125 predictor database (mean  $R_{cv}^2 = 0.076$ ).

126  
127 To test the predictive accuracy of the CMC-derived DLPFC models, and to benchmark this  
128 against existing GTEx-derived prediction models, genetically-regulated gene expression (GREX)  
129 was calculated in an independent DLPFC RNA-sequencing dataset (the Religious Orders Study  
130 Memory and Ageing Project, ROSMAP<sup>19</sup>). We compared predicted GREX to measured  
131 ROSMAP gene expression for each gene (Replication  $R^2$ , or  $R_R^2$ ) for the CMC-derived DLPFC  
132 models and twelve GTEx-derived brain tissue models<sup>15,20,21</sup> (Figure 1, Supplementary Figure  
133 2B). CMC-derived DLPFC models had higher average  $R_R^2$  values (Mean  $R_R^2 = 0.056$ ), more  
134 genes with  $R_R^2 > 0.01$ , and significantly higher overall distributions of  $R_R^2$  values than any of the  
135 twelve GTEx models (ks-test,  $p < 2.2 \times 10^{-16}$  across all analyses; Figure 1). Median  $R_R^2$  values were  
136 significantly correlated with sample size of the original tissue set ( $\rho = 0.92$ ,  $p = 7.2 \times 10^{-6}$ ), the  
137 number of genes in the prediction model ( $\rho = 0.9$ ,  $p = 2.6 \times 10^{-5}$ ), and the number of significant  
138 ‘eGenes’ in each tissue type ( $\rho = 0.95$ ,  $p = 5.5 \times 10^{-7}$ ; Figure 1C). Notably, these correlations persist  
139 after removing obvious outliers (Figure 1C).

140  
141 To estimate trans-ancestral prediction accuracy, genetically regulated gene expression was  
142 calculated for 162 African-American individuals and 280 European individuals from the NIMH  
143 Human Brain Collection Core (HBCC) dataset (supplementary figure 2B).  $R_R^2$  values were

144 higher on average in Europeans than African-Americans (average  $R_{R\_EUR}^2 = 0.048$ ,  $R_{R\_AA}^2 =$   
145  $0.040$ ), but were significantly correlated between African-Americans and Europeans ( $\rho=0.78$ ,  
146  $p<2.2 \times 10^{-16}$ , Pearson test; supplementary figure 3).

147

### 148 **Application of Transcriptomic Imputation to Schizophrenia**

149 We used CMC DLPFC and the 12 GTEx-derived brain tissue prediction models to impute  
150 genetically regulated expression levels (GREX) of 19,661 unique genes in cases and controls  
151 from the PGC-SCZ GWAS study<sup>22</sup>. Predicted expression levels were tested for association with  
152 schizophrenia. Additionally, we applied CMC and GTEx-derived prediction models to summary  
153 statistics from 11 PGC cohorts (for which raw genotypes were unavailable) and the CLOZUK2  
154 cohort. Meta-analysis was carried out across all PGC-SCZ and CLOZUK2 cohorts using an  
155 odds-ratio based approach in METAL. Our final analysis included 40,299 cases and 65,264  
156 controls (Figure 2A).

157

158 We identified 413 genome-wide significant associations, representing 256 genes in 13 tissues  
159 (Figure 3A). The largest number of associations were detected in the CMC DLPFC GREX data  
160 (Figure 3C; 49 genes outside the MHC, 69 genes overall). We sought replication of our CMC  
161 DLPFC SCZ-associations in an independent dataset of 4,133 cases and 24,788 controls in  
162 collaboration with the iPSYCH-GEMS SCZ working group (Figure 2B). We found significant  
163 correlation of effect sizes ( $p=1.784 \times 10^{-04}$ ;  $\rho=0.036$ ) and  $-\log_{10}$  p-values ( $p=1.073 \times 10^{-05}$ ;  
164  $\rho=0.043$ ) between our discovery (PGC+CLOZUK2) and replication (iPSYCH-GEMS)  
165 samples. Non-MHC Genes reaching genome-wide significance in our discovery sample (49  
166 genes) were significantly more likely to reach nominal significance in the replication sample, and  
167 had significantly more consistent directions of effect than might be expected by chance  
168 (binomial test,  $p=2.42 \times 10^{-05}$ ,  $p=0.044$ ). (Suppl. info).

169

170 To identify the top independent associations within genomic regions, which include multiple  
171 associations for a single gene across tissues, or multiple nearby genes, we partitioned genic  
172 associations into 58 groups defined based on genomic proximity and applied stepwise forward  
173 conditional analysis within each group (Supplementary Table 1). In total, 67 genes remained  
174 genome-wide significant after conditioning (Table 1; Figure 3A-B). The largest signal was

175 identified in the CMC DLPFC predicted expression data (24 genes; Figure 3C), followed by the  
176 Putamen (7 genes). 19/67 genes did not lie within 1Mb of a previously genome-wide significant  
177 GWAS locus<sup>22</sup> (shown in bold, Table 1); of these, 5/19 genes were within 1Mb of a locus which  
178 approached genome-wide significance ( $p < 5 \times 10^{-07}$ ). The remaining 14 genes all fall within  
179 nominally significant PGC-SCZ GWAS loci ( $p < 8 \times 10^{-04}$ ), but did not reach genome-wide  
180 significance.

181

### 182 **Implicated genes highlight SCZ-associated molecular pathways and gene set analyses**

183 We tested for overlap between our non-MHC SCZ-associated genes and 8,657 genesets  
184 comprised of 1) hypothesis-driven pathways and 2) general molecular database pathways. We  
185 corrected for multiple testing using the Benjamin-Hochberg false discovery rate (FDR)  
186 correction<sup>23</sup>.

187

188 We identified three significantly associated pathways in our hypothesis-driven analysis (Table  
189 2). Targets of the fragile-X mental retardation protein formed the most enriched pathway  
190 (FMRP;  $p = 1.96 \times 10^{-8}$ ). Loss of FMRP inhibits synaptic function, is comorbid with autism  
191 spectrum disorder, and causes intellectual disability, as well as psychiatric symptoms including  
192 anxiety, hyperactivity and social deficits<sup>24</sup>. Enrichment of this large group of genes has been  
193 observed frequently, in the original CommonMind analysis<sup>14</sup>, by colleagues investigating the  
194 same PGC and CLOZUK2 samples<sup>26</sup> as well as by investigators studying autism<sup>24,27</sup>. There was  
195 a significant enrichment among our SCZ associated genes and genes that have been shown to be  
196 intolerant to loss-of-function mutations<sup>28</sup> ( $p = 5.86 \times 10^{-5}$ ) as well as with CNVs associated with  
197 bipolar disorder<sup>29</sup> ( $p = 7.92 \times 10^{-8}$ ), in line with a recent variant-based study of the same  
198 individuals<sup>26</sup>.

199

200 Next, we performed an agnostic search for overlap between our schizophrenia-associated genes  
201 and ~ 8,500 molecular pathways collated from large, publicly available databases. 33 pathways  
202 were significantly enriched after FDR correction (Table 2, Suppl. Table 2), including a number  
203 of pathways with some prior literature in psychiatric disease. We identified an enrichment with  
204 porphyrin metabolism ( $p = 1.03 \times 10^{-4}$ ). Deficiencies in porphyrin metabolism lead to “Porphyria”,  
205 an adult-onset metabolic disorder with a host of associated psychiatric symptoms, in particular



206 episodes of violence and psychosis<sup>30–35</sup>. Five pathways potentially related to porphyrin  
207 metabolism, regarding abnormal iron level in the spleen, liver and kidney are also significantly  
208 enriched, including 2/5 of the most highly enriched pathways ( $p < 2.0 \times 10^{-04}$ ). The PANTHER  
209 and REACTOME pathways for Heme biosynthesis and the GO pathway for protoporphyrinogen  
210 IX metabolic process, which are implicated in the development of porphyric disorders, are also  
211 highly enriched ( $p = 2.2 \times 10^{-04}$ ,  $2.6 \times 10^{-04}$ ,  $4.1 \times 10^{-04}$ ), although do not pass FDR-correction.

212  
213 Hexosaminidase activity was enriched ( $p = 3.47 \times 10^{-05}$ ) in our results; this enrichment is not  
214 driven by a single highly-associated gene; rather, every single gene in the HEX-A pathway is  
215 nominally significant in the SCZ association analysis (Supplementary Table 2). Deficiency of  
216 hexosaminidase A (HEX-A) results in serious neurological and mental problems, most  
217 commonly presenting in infants as “Tay-Sachs” disease<sup>36</sup>. Adult-onset HEX-A deficiency  
218 presents with neurological and psychiatric symptoms, notably including onset of psychosis and  
219 schizophrenia<sup>37</sup>. Five pathways corresponding to Ras- and Rab- signaling, protein regulation and  
220 GTPase activity were enriched ( $p < 6 \times 10^{-05}$ ). These pathways have a crucial role in neuron cell  
221 differentiation<sup>38</sup> and migration<sup>39</sup>, and have been implicated in the development of schizophrenia  
222 and autism<sup>40–43</sup>. We also find significant enrichment with protein phosphatase type 2A regulator  
223 activity ( $p = 5.24 \times 10^{-05}$ ), which was associated with MDD and across MDD, BPD and SCZ in the  
224 same large integrative analysis<sup>44</sup>, and has been implicated in antidepressant response and  
225 serotonergic neurotransmission<sup>45</sup>.

## 226 227 **Predicted gene expression changes are consistent with functional validation studies**

228 To test the functional impact of our SCZ-associated predicted gene expression changes (GREX),  
229 we performed two in-silico analyses. First, we compared directions of effect in our meta-analysis  
230 to those in the CMC analysis of differentially expressed genes between SCZ cases and controls.  
231 This analysis highlighted six loci where expression levels of a single gene putatively affected  
232 schizophrenia risk. All six of these genes are nominally significant in our DLPFC analysis, and  
233 two (*CLCN3* and *FURIN*) reach genome-wide significance. In the conditional analysis across all  
234 brain regions, one additional gene (*SNXI9*) reaches genome-wide significance. The direction of  
235 effect for all six genes matches the direction of gene expression changes observed in the original  
236 CMC paper, indicating that gene expression estimated in the imputed transcriptome reflects

237 measured expression levels in brains of individuals with Schizophrenia. Further, this observation  
238 is consistent with a model where the differential expression signature observed in CMC is caused  
239 by genetics rather than environment.

240  
241 The original CMC analysis identified 21 eSNP genes using SHERLOCK<sup>14,46</sup>, of which 17 were  
242 present in our CMC DLPFC analysis. 14/17 genes reached nominal significance (significantly  
243 more than expected by chance,  $p=3.6 \times 10^{-16}$ ), and 11 reached genome-wide significance  
244 (binomial p-value  $6.04 \times 10^{-55}$ ). Additionally, 31 regions contained genes ranked highly by  
245 Sherlock in the original CMC analysis (supplementary data file 2 in Fromer, M. *et al.* Gene  
246 expression elucidates functional impact of polygenic risk for schizophrenia. *Nat. Neurosci.* 19,  
247 1442–1453 (2016)<sup>14</sup>). Of these, 14 regions lay near one of our CMC DLPFC associated genes,  
248 and 13/14 regions had common genes between SHERLOCK and PrediXcan analyses. Five loci  
249 included multiple SHERLOCK genes; in every instance we are able to specifically identify one  
250 or two associated genes from the longer SHERLOCK list.

251  
252 To understand the impact of altered expression of our 67 SCZ-associated genes, we performed  
253 an in-silico analysis of mouse mutants, by collating large, publicly available mouse databases<sup>47–</sup>  
254 <sup>51</sup>. We identified mutant mouse lines lacking expression of 37/67 of our SCZ-associated genes,  
255 and obtained 5,333 phenotypic data points relating to these lines, including 1,170 related to  
256 behavioral, neurological or craniofacial phenotypes. 25/37 genes were associated with at least  
257 one behavioral, neurological or related phenotype (Supplementary table 3). We repeated this  
258 analysis for genes identified in 366 GWAS, including any GWAS for which at least ten mutant  
259 mouse lines exist (105 GWAS). SCZ-associated genes were more likely to be associated with  
260 behavior, brain development and nervous system phenotypes than genes in these GWAS sets  
261 ( $p=0.057$ ).

262  
263 **Spatiotemporal expression of SCZ-associated genes indicated distinct patterns of risk**  
264 **throughout development**

265 We assessed expression of our SCZ-associated genes throughout development using  
266 BRAINSPAN<sup>52</sup>. Data were partitioned into eight developmental stages (four pre-natal, four post-  
267 natal), and four brain regions<sup>29,52</sup> (Figure 4A). We noted that SCZ-associated genes were

268 significantly co-expressed, in both pre-natal and post-natal development and in all four brain  
269 regions, based on local connectedness<sup>53</sup> (Figure 4B), global connectedness<sup>53</sup> (i.e., average path  
270 length between genes, supplementary Figure 6), and network density (i.e., number of edges,  
271 supplementary Figure 7). Examining pairwise gene expression correlation (suppl. Fig 8) and  
272 gene co-expression networks (suppl. Fig 9) for each spatiotemporal point indicated that the same  
273 genes do not drive this co-expression pattern throughout development; rather, it appears that  
274 separate groups of genes drive early pre-natal, late pre-natal and post-natal clustering.

275  
276 To visualize this, we calculated Z scores of gene expression for each SCZ-associated gene,  
277 across all 32 time-points (Figure 5). Genes clustered into four groups (supplementary fig 10),  
278 with distinct spatio-temporal expression signatures. The largest cluster (Cluster A, Figure 5A; 29  
279 genes) spanned early to late-mid pre-natal development (4-24 weeks post conception), either  
280 across the whole brain (22 genes) or in regions 1-3 only (7 genes). 12 genes were expressed in  
281 late pre-natal development (Figure 5D; 25-38 pcw); 10 genes were expressed in regions 1-3,  
282 post-natally and in the late pre-natal period (Figure 5C), and 15 genes were expressed throughout  
283 development (Figure 5B), either specifically in region four (nine genes) or throughout the brain  
284 (six genes). We used a stratified qq-plot approach<sup>54</sup> to examine whether SNPs in cis-regions of  
285 genes in these four clusters are differentially enriched in psychiatric disorders. SNPs in cis-  
286 regions of genes in the two pre-natal clusters are more highly enriched than SNPs in cis-regions  
287 of genes in post-natal clusters, and compared to all SNPs, in childhood-onset disorders (ASD and  
288 ADHD, supplementary figure 13), but not adult-onset disorders (BPD and MDD, data not  
289 shown).

290  
291 We noticed a relationship between patterns of gene expression and the likelihood of behavioral,  
292 neurological or related phenotypes in our mutant mouse model database. Mutant mice lacking  
293 genes expressed exclusively pre-natally in humans, or genes expressed pre- and post-natally,  
294 were more likely to have any behavioral or neurological phenotypes than mutant mice lacking  
295 expression of genes expressed primarily in the third trimester or post-natally ( $p=1.7 \times 10^{-04}$ )  
296 (supplementary figure 11).

297  
298

## 299 **Discussion**

300 In this study, we present gene expression prediction models for the dorso-lateral pre-frontal  
301 cortex (DLPFC), constructed using CommonMind Consortium genotype and gene expression  
302 data. These prediction models may be applied to either raw data or summary statistics, in order to  
303 yield gene expression information in large data sets, and across a range of tissues. This has the  
304 significant advantage of allowing researchers to access transcriptome data for non-peripheral  
305 tissues, at scales currently prohibited by the high cost of RNA sequencing, and circumventing  
306 distortions in measures of gene expression stemming from errors of measurement or  
307 environmental influences. Since disease status may alter gene expression but not the germline  
308 profile, analyzing genetically regulated expression ensures that we identify only the causal  
309 direction of effect between gene expression and disease<sup>15</sup>. Large, imputed transcriptomic datasets  
310 represent the first opportunity to study the role of subtle gene expression changes (and therefore  
311 modest effect sizes) in disease development.

312  
313 There are some inherent limitations to this approach. The accuracy of transcriptomic imputation  
314 (TI) is reliant on access to large eQTL reference panels, and it is therefore vital that efforts to  
315 collect and analyze these samples continue. TI has exciting advantages for gene discovery as  
316 well as downstream applications<sup>15,55,56</sup>; however, the relative merits of existing methodologies  
317 are as yet under-explored. Our analysis suggests that, overall, sparser elastic net models better  
318 capture gene expression regulation than BSLMM; at the same time, the improved performance of  
319 elastic net over max-eQTL models suggests that a single eQTL model is over-simplified<sup>2,15</sup>.  
320 Fundamentally, transcriptomic imputation methods model only the genetically regulated portion  
321 of gene expression, and so cannot capture or interpret variance of expression induced by  
322 environment or lifestyle factors, which may be of particular importance in psychiatric disorders.  
323 Given the right study design, analyzing genetic components of expression together with observed  
324 expression could open doors to better study the role of gene expression in disease.

325  
326 Sample size and tissue matching contribute to accuracy of TI results. Our CMC-derived DLPFC  
327 prediction models had higher average validation  $R^2$  values in external DLPFC data than GTEx-  
328 derived brain tissue models. Notably, the model with the second highest percent of genes passing  
329 the  $R^2$  threshold is the Thyroid, which has the largest sample size among the GTEx brain

330 prediction models. When looking at mean  $R^2$  values, the second highest value comes from the  
331 GTEx Frontal Cortex, despite the associated small sample size, implying at least some degree of  
332 tissue specificity of eQTLs architecture.

333  
334 We were able to compare TI accuracy in European and African-American individuals, and found  
335 that our models were applicable to either ethnicity with only a small decrease in accuracy.  
336 Common SNPs shared across ethnicities have important effects on gene expression, and as such  
337 we expect GREX to have consistency across populations. There is a well-documented dearth of  
338 exploration of genetic associations in non-European cohorts<sup>57,58</sup> We believe that these analyses  
339 should be carried out in non-European cohorts.

340  
341 We applied the CMC DLPFC prediction models, along with 12 GTEx-derived brain expression  
342 prediction models, to schizophrenia cases and controls from the PGC2 and CLOZUK2  
343 collections, constituting the largest transcriptomic analysis of schizophrenia to date. Predicted  
344 gene expression levels were calculated for 19,661 unique genes across brain regions (Figure 1C)  
345 and tested for association with SCZ case-control status. We identified 413 significant  
346 associations, constituting 67 independent associations. We found significant replication of our  
347 CMC DLPFC associations in a large independent replication cohort, in collaboration with the  
348 iPSYCH-GEMS consortium. A recent TWAS study of 30 GWAS summary statistic traits<sup>55</sup>  
349 identified 38 non-MHC genes associated at tissue-level significance with SCZ in CMC- and  
350 GTEx-derived brain tissues (ie, matching those used in our study). Of these, 26 also reach  
351 genome-wide significance in our study, although in many instances these genes are not identified  
352 as the lead independent associated gene following our conditional analysis. Among our 67 SCZ-  
353 associated genes, 19 were novel, i.e. did not fall within 1Mb of a previous GWAS locus  
354 (including 5/7 of the novel brain genes identified in the recent TWAS analysis).

355  
356 We used conditional analyses to identify independent associations within loci. These analyses  
357 clarify the most strongly associated genes and tissues (Table 1), while we note that nearly  
358 collinear gene-tissue pairs could also represent causal associations. The tissues highlighted  
359 allowed us to tabulate apparently independent contributions to SCZ risk from different brain

360 regions, even though their transcriptomes are highly correlated generally. We find DLPFC and  
361 Cerebellum effects, as well as from Putamen, Caudate and Nucleus Accumbens Basal Ganglia.

362  
363 We used these genic associations to search for enrichments with molecular pathways and gene  
364 sets, and identified 36 significant enriched pathways. Among novel pathways, we identified a  
365 significant association with HEX-A deficiency. Despite the well-studied and documented  
366 symptomatic overlap between adult-onset HEX-A deficiency and schizophrenia, we believe that  
367 this is the first demonstration of shared genetics between the disorders. Notably, this overlap is  
368 not driven by a single highly-associated gene which is shared by both disorders; rather, every  
369 single gene in the HEX-A pathway is nominally significant in the SCZ association analysis, and  
370 five genes have  $p < 1 \times 10^{-03}$ , indicating that there may be substantial shared genetic aetiology  
371 between the two disorders that warrants further investigation. Additionally, we identified a  
372 significant overlap between our SCZ-associated genes and a number of pathways associated with  
373 porphyrin metabolism. Porphyrin disorders have been well characterized and are among early  
374 descriptions of “schizophrenic” and psychotic presentations of schizophrenia, as described in the  
375 likely eponymous mid-19<sup>th</sup> century poem “Porphyria’s Lover”, by Robert Browning<sup>59</sup>, and have  
376 been cited as a likely diagnosis for the various psychiatric and metabolic ailments of Vincent van  
377 Gogh<sup>60–65</sup> and King George III<sup>66</sup>.

378  
379 Finally, we assessed patterns of expression for the 67 SCZ-associated genes throughout  
380 development using spatio-temporal transcriptomic data obtained from BRAINSPAN. We  
381 identified four clusters of genes, with expression in four distinct spatiotemporal regions, ranging  
382 from early pre-natal to strictly post-natal expression. There are plausible hypotheses and genetic  
383 evidence for SCZ disease development in adolescence, given the correlation with age of onset, as  
384 well as prenatally, supported by genetic overlap with neurodevelopmental disorders<sup>67–69</sup> as well  
385 as the earlier onset of cognitive impairments<sup>70–73</sup>. Understanding the temporal expression  
386 patterns of SCZ-associated genes can help to elucidate gene development and trajectory, and  
387 inform research and analysis design. Identification of SCZ-associated genes primarily expressed  
388 prenatally is striking given our adult eQTL reference panels, and may reflect common eQTL  
389 architecture across development, which is known to be partial<sup>74–76</sup>; therefore, our results should  
390 spur interest in extending TI data and/or methods to early development<sup>74</sup>. Identification of SCZ-

391 associated genes primarily expressed in adolescence and adult-hood is of particular interest for  
392 direct analysis of the brain transcriptome in adult psychiatric cases.

393

394 eQTL data have been recognized for nearly a decade as potentially important for understanding  
395 complex genetic variation. Nicolae et al<sup>1</sup> showed that common variant-common disease  
396 associations are strongly enriched for genetic regulation of gene expression. Therefore,  
397 integrative approaches combining transcriptomic and genetic association data have great  
398 potential. Current TI association analyses increase power for genetic discovery, even while many  
399 open areas of TI remain to be developed, such as leveraging additional data types such as  
400 chromatin modifications<sup>77</sup> (e.g. methylation, histone modification), imputing different tissues or  
401 different exposures (e.g. age, smoking, trauma) and modeling trans/coexpression effects. It  
402 remains critical to leverage TI associations to provide insights into specific disease mechanisms.  
403 Here, the accelerated identification of disease associated genes allows the detection of novel  
404 pathways and distinct spatiotemporal patterns of expression in schizophrenia risk.

405

406

407 **Online Methods (Limit 3,000 words, at end of manuscript, currently 2,064)**

408

409 **Creating gene expression predictors for the dorso-lateral pre-frontal cortex**

410 **eQTL Data**

411 Genotype and RNAseq data were obtained for 538 European individuals through the  
412 CommonMind Project<sup>14</sup>. RNA-seq data were generated from post-mortem human dorsolateral  
413 prefrontal cortex (DLPFC). The gene expression matrix was normalized to log(counts per  
414 million) using voom. Adjustments were made for known covariates (including sample  
415 ascertainment, quality, experimental parameters, ancestry) and surrogate variables, using linear  
416 modelling with voom-derived regression weights. Details on genotyping, imputation and RNA-  
417 seq generation may be found in the CommonMind Consortium flagship paper<sup>14</sup>.

418

419 A 1% MAF cut-off was applied. Variants were filtered to remove any SNPs in high LD ( $r^2 > 0.9$ ),  
420 indels, and all variants with ambiguous ref/alt alleles. All protein coding genes on chromosomes  
421 1-22 with at least one cis-SNP after these QC steps were included in this analysis. SNPs in trans  
422 have been shown not to provide a substantial improvement in prediction accuracy<sup>15</sup> and were not  
423 included here.

424

425 **Building gene expression prediction databases**

426 Gene expression prediction models were created following the “PrediXcan” method<sup>15</sup>. Matched  
427 genotype and gene expression data were used to identify a set of variants that influence gene  
428 expression (Supplementary Figure 2A). Weights for these variants are calculated using  
429 regression in a ten-fold cross-validation framework. All cross-validation folds were balanced for  
430 diagnoses, ethnicity, and other clinical variables.

431

432 All SNPs within the cis-region (+/- 1mb) of each gene were included in the regression analysis.  
433 Accuracy of prediction was estimated by comparing predicted expression to measured  
434 expression, across all 10 cross-validation folds; this correlation was termed cross-validation  $R^2$  or  
435  $R_{cv}^2$ . Genes with  $R_{cv}^2 > 0.01$  ( $\sim p < 0.05$ ) were included in our final predictor database.

436



437 Prediction models were compared across four different regression methods; elastic net  
438 (prediXcan), ridge regression (using the TWAS method<sup>16</sup>), Bayesian sparse linear mixed  
439 modelling (BSLMM; TWAS), and linear regression using the best eQTL for each gene  
440 (Supplementary Figure 1A). Mean  $R_{cv}^2$  values were significantly higher for elastic net regression  
441 (mean  $R_{cv}^2=0.056$ ) than for eQTL-based prediction (mean  $R_{cv}^2=0.025$ ), BSLMM (mean  
442  $R_{cv}^2=0.021$ ) or Ridge Regression (mean  $R_{cv}^2=0.020$ ). The distribution of  $R_{cv}^2$  values was also  
443 significantly higher for elastic net regression than for any other method (ks-test,  $p<2.2\times 10^{-16}$ ).

444

#### 445 **Replication of gene expression prediction models in independent data**

446 Predictive accuracy of CMC DLPFC models were tested in two independent datasets.

447 First, we used data from the Religious Orders Study and Memory and Aging Project  
448 (ROSMAP<sup>19</sup>). This study included genotype data and DLPFC RNA-seq data<sup>78</sup> for 451  
449 individuals of European descent (Supplementary Figure 2B).

450

451 DLPFC genetically-regulated expression (GREX) was calculated using the CMC DLPFC  
452 predictor models. Correlation between RNA-seq expression and CMC DLPFC GREX  
453 (“Replication  $R^2$  values” or  $R_R^2$ ) was used as a measure of predictive accuracy.  $R_R^2$  was  
454 calculated including correction for ten ancestry components, as follows:

455 *Equation 1:  $R_R^2$  calculation.*

$$456 \quad R_{R1}^2 = (M \sim GREX + PC_1 + PC_2 + \dots + PC_{10})$$

$$457 \quad R_{R2}^2 = (M \sim PC_1 + PC_2 + \dots + PC_{10})$$

$$458 \quad R_R^2 = R_{R1}^2 - R_{R2}^2$$

459

460 Where:

|        |                                     |
|--------|-------------------------------------|
| $M$    | Measured expression (RNA-seq)       |
| $GREX$ | GREX imputed expression             |
| $PC_n$ | $n^{\text{th}}$ Principal Component |

461

462 A small number of genes (158) had very low predictive accuracy and were removed from further  
463 analyses. Cross-validation  $R^2$  ( $R_{cv}^2$ ) values and  $R_R^2$  values were highly correlated ( $\rho=0.62$ ,  
464  $p<2.2\times 10^{-16}$ ; Supplementary Figure 3A). 55.7% of CMC DLPFC genes had  $R_R^2$  values  $> 0.01$ .

465  
466 Prediction accuracy was also assessed for 11 publicly available GTEx neurological predictor  
467 databases, and  $R_R^2$  values used to compare to CMC DLPFC performance. CMC DLPFC models  
468 had higher average  $R_R^2$  values, more genes with  $R_R^2 > 0.01$ , and significantly higher overall  
469 distributions of  $R_R^2$  values than any of the twelve GTEx brain tissue models (ks-test,  $p < 2.2e-16$ ;  
470 Figure 1A,B).

471  
472 To estimate trans-ancestral prediction accuracy, genetically regulated gene expression was  
473 calculated for 162 African-American individuals and 280 European individuals from the NIMH  
474 Human Brain Collection Core (HBCC) dataset<sup>79</sup> (Supplementary Figure 2C). Predicted gene  
475 expression levels were compared to DLPFC expression levels measured using microarray. There  
476 was a significant correlation between the European and African-American samples for  $R_{CV}^2$   
477 values and  $R_R^2$  values ( $\rho = 0.66, 0.56$ ; Supplementary figure 3B-C).  $R_R^2$  values were higher on  
478 average in Europeans, but were significantly correlated between African-Americans and  
479 Europeans ( $\rho = 0.78, p < 2.2e-16$ , Pearson test; supplementary figure 3D).

480  
481 **Extension to Summary Statistics**  
482 Transcriptomic Imputation may be applied to summary statistics instead of raw dosages, in  
483 instances where raw data is unavailable. However, this method suffers from slightly reduced  
484 accuracy, requires covariance matrices calculated in an ancestrally-matched reference  
485 population<sup>80</sup> (usually only possible for European cohorts), and precludes testing of  
486 endophenotypes within the data, and so should not be applied when raw data is available.

487  
488 We assessed concordance between CMC DLPFC transcriptomic imputation results using  
489 summary-statistics (MetaXcan<sup>80</sup>) and raw genotypes (PrediXcan<sup>15</sup>) using nine European and  
490 three Asian PGC-SCZ cohorts<sup>22</sup> for which both data types were available. Cohorts were chosen  
491 to encompass a range of case : control ratios, to test previous suggestions that accuracy is  
492 reduced in unbalanced cohorts<sup>80</sup>. Covariances for all variants included in the DLPFC predictor  
493 models were computed using MetaXcan<sup>80</sup>. For all European cohorts, Pearson correlation of log-  
494 10 p-values and effect sizes was above 0.95. The mean correlation was 0.963 (Supplementary  
495 Figure 4). There was no correlation between total sample size, case-control ratio, p-value or

496 effect-size. Seven genes were removed due to discordant p-values. For the three Asian cohorts  
497 tested, the mean correlation was 0.91 (Supplementary Figure 5).

498  
499 Concordance was also tested for the same nine European PGC-SCZ cohorts, across 12  
500 neurological GTEx prediction databases. All correlations were significant ( $\rho > 0.95$ ,  $p < 2.2e-16$ ).  
501 There was a significant correlation between p-value concordance and case-control ratio  
502 ( $\rho = 0.37$ ,  $p = 7.606 \times 10^{-15}$ ). 114 genes had discordant p-values between the two methods and  
503 were excluded from future analyses.

504

## 505 **Application to Schizophrenia**

### 506 **Dataset Collection**

507 We obtained 53 discovery cohorts for this study, including 40,299 SCZ cases and 65,264  
508 controls (Figure 2). 52/53 cohorts (35,079 cases, 46,441 controls) were obtained through  
509 collaboration with the Psychiatric Genomics Consortium, and are described in the 2014 PGC  
510 Schizophrenia GWAS<sup>22</sup>. The remaining cohort, referred to as CLOZUK2, constitutes the largest  
511 single cohort of individuals with Schizophrenia (5,220 cases and 18,823 controls), collected as  
512 part of an effort to investigate treatment-resistant Schizophrenia<sup>26</sup>.

513

514 50/53 datasets included individuals of European ancestry, while three datasets include  
515 individuals of Asian ancestry (1,836 cases, 3,383 controls). All individuals were ancestrally  
516 matched to controls. Information on genotyping, quality control and other data management  
517 issues may be found in the original papers describing these collections<sup>22,26</sup>. All sample  
518 collections complied with ethical regulations. Details regarding ethical compliance and consent  
519 procedures may be found in the original manuscripts describing these collections<sup>22,26</sup>.

520

521 Access to dosage data was available for 44/52 PGC-SCZ cohorts. The remaining PGC cohorts,  
522 and the CLOZUK2 cohort provided summary statistics. Three European PGC cohorts were trio-  
523 based, rather than case-control.

524

525 Additionally, we tested for replication of our CMC DLPFC associations in an independent  
526 dataset of 4,133 cases and 24,788 controls obtained through collaboration with the iPSYCH-

527 GEMS schizophrenia working group (effective sample size 14,169.5; Figure 2B, supplementary  
528 information).

529

### 530 **Transcriptomic Imputation and association testing**

531 Transcriptomic Imputation was carried out individually for each case-control PGC-SCZ cohort  
532 with available dosage data (44/52 cohorts). Predicted gene expression levels were computed  
533 using the DLPFC predictors described in this manuscript, as well as for 11 other brain tissues  
534 prediction databases created using GTEx tissues<sup>15,20,21,81</sup> (Figure 1C). Associations between  
535 predicted gene expression values and case-control status were calculated using a linear  
536 regression test in R. Ten ancestry principal components were included as covariates. Association  
537 tests were carried out independently for each cohort, across 12 brain tissues.

538

539 For the 8 PGC cohorts with no available dosage data, the three PGC trio-based analyses, and the  
540 CLOZUK2 cohort, a summary-statistic based transcriptomic imputation approach was used  
541 (“MetaXcan”), as described previously.

542

### 543 **Meta-analysis**

544 Meta-analysis was carried out across all 53 cohorts using METAL<sup>82</sup>. Cochran’s Q test for  
545 heterogeneity was implemented in METAL<sup>82,83</sup>, and a heterogeneity p-value threshold of  $p >$   
546  $1 \times 10^{-3}$  applied to results. A conservative significance threshold was applied to these data,  
547 correcting for the total number of genes tested across all tissues (121,611 gene-region tests in  
548 total). This resulted in a genome-wide significance threshold of  $4.1 \times 10^{-7}$ .

549

550 Effect sizes and direction of effect quoted in this manuscript refer to changes in predicted  
551 expression in cases compared to controls i.e., genes with negative effect sizes have decreased  
552 predicted expression in cases compared to controls.

553

### 554 **Identifying independent associations**

555 We identified a number of genomic regions which contained multiple gene associations and/or  
556 genes associated across multiple tissues. We identified 58 of these regions, excluding the MHC,  
557 based on distance between associated genes, and verified them using visual inspection. In order

558 to identify independent genic associations within these regions, we carried out a stepwise  
559 forward conditional analysis following “GCTA-COJO” theory<sup>84</sup> using “CoCo”  
560 (<https://github.com/theboocock/coco/>), an R implementation of GCTA-COJO. CoCo allows the  
561 specification of custom correlation matrices by the user (for example, ancestrally specific LD  
562 matrices). For each region, we generated a predicted gene expression correlation matrix for all  
563 significant genes ( $p \leq 1 \times 10^{-6}$ ), as the root-effective sample size ( $N_{eff}$ , eqn 2) weighted average  
564 correlation across all cohorts where we had access to dosage data.

565 *Equation 2: Effective Sample Size,  $N_{eff}$*

566 
$$N_{eff} = \frac{4}{\left(\frac{1}{N_{cases}} + \frac{1}{N_{controls}}\right)}$$

567  
568 Forward stepwise conditional analysis of all significant genes was carried out using joint linear  
569 regression modeling. First, the top-ranked gene was added to the model, then the next most  
570 significant gene in a joint model is added if significant at a given p-value threshold, and so on  
571 until either all genes are added to the model, or no joint statistic reaches the significance  
572 threshold.

573  
574 We calculated effect sizes and odds ratios for SCZ-associated genes by adjusting “CoCo” betas  
575 to have unit variance (Table 1, eqn. 3).

576 *Equation 3: GREX Beta adjustment*

577 
$$\beta = \beta_{CoCo} \times \sqrt{GVAR}$$

578  
579 Where GVAR is the variance of the GREX predictor for each gene.

## 580 581 **Gene set Analyses**

582 Pathway analyses were carried out using an extension to MAGMA<sup>85</sup>. P-values were assigned to  
583 genes using the most significant p-value achieved by each gene in the meta-analysis. We then  
584 carried out a competitive gene-set analysis test using these p-values, using two gene sets:

- 585  
586 1. 159 gene sets with prior hypotheses for involvement in SCZ development, including loss-  
587 of-function intolerant genes, CNV-intolerant genes, targets of the fragile-X mental

588           retardation protein, CNS related gene sets, and 104 behavioural and neurological  
589           pathways from the Mouse Genome Informatics database<sup>14,26,67,86</sup>.

590           2. An agnostic analysis, including ~8,500 gene sets collated from publicly available  
591           databases including GO<sup>87,88</sup>, KEGG<sup>89</sup>, REACTOME<sup>90</sup>, PANTHER<sup>91,92</sup>, BIOCARTA<sup>93</sup>  
592           and MGI<sup>48</sup>. Sets were filtered to include only gene sets with at least ten genes.

593

594           Significance levels were adjusted across all pathways included in either test using the  
595           Benjamini-Hochberg “FDR” correction in R<sup>23</sup>.

596

### 597 **Coexpression of SCZ genes throughout development**

598           We investigate spatiotemporal expression of our associated genes using publicly available  
599           developmental transcriptome data, obtained from the BRAINSPAN consortium<sup>94</sup>. We partitioned  
600           these data into biologically relevant spatio-temporal data sets<sup>95</sup>, corresponding to four general  
601           brain regions; the frontal cortex, temporal and parietal regions, sensory-motor regions, and  
602           subcortical regions (Figure 4A<sup>96</sup>), and eight developmental time-points (four pre-natal, four post-  
603           natal)<sup>95</sup>.

604

605           First, we tested for correlation of gene expression for all SCZ-associated genes at each  
606           spatiotemporal time-point. Genes with pearson correlation coefficients  $\geq 0.8$  or  $\leq -0.8$  were  
607           considered co-expressed. 100,000 iterations of this analysis were carried out using random gene  
608           sets with equivalent expression level distributions to the SCZ-associated genes. For each gene  
609           set, a gene co-expression network was created, with edges connecting all co-expressed genes.  
610           Networks were assessed using three criteria; first, the number of edges within the network, as a  
611           crude measure of connectedness; second, the Watts-Strogatz average path length between  
612           nodes, as a global measure of connectedness across all genes in the network<sup>53</sup>; third, the Watts-  
613           Strogatz clustering coefficient, to measure tightness of the clusters within the network<sup>53</sup>. For  
614           each spatio-temporal time point, we plotted gene-pair expression correlation (suppl. Fig 8) and  
615           co-expression networks (suppl. Fig 9).

616

617           For each of the 67 SCZ-associated genes, we calculated average expression at each  
618           spatiotemporal point. We then calculated Z-Score of expression specificity using these values,

619 and plotted Z-Scores to visually examine patterns of gene expression throughout development  
620 and across brain regions. Clusters were formally identified using a dendrogram cut at height 10  
621 (Suppl. Fig 10).

622

### 623 **In-silico replication of SCZ-associated genes in mouse models**

624 We downloaded genotype, knock-out allele information and phenotyping data for ~10,000  
625 mouse mutant models from five large mouse phenotyping and genotyping projects; Mouse  
626 Genome Informatics (MGI<sup>48</sup>), EuroPhenome<sup>47,97</sup>, Mouse Genome Project (MGP<sup>47,49</sup>),  
627 International Mouse Phenotyping Consortium (IMPC<sup>50</sup>), and Infection and Immunity  
628 Immunophenotyping (3I<sup>98</sup>). Where possible, we also downloaded raw phenotyping data  
629 regarding specific assays. In total, we obtained 175,012 phenotypic measurements, across 10,288  
630 mutant mouse models. We searched for any mouse lines with phenotypes related to behavior  
631 (natural, observed, stereotypic or assay-induced); cognition or working memory; brain, head or  
632 craniofacial dysmorphology; retinal or eye morphology, and/or vision or visual dysfunction or  
633 impairment; ear morphology or hearing dysfunction or impairment; neural tube defects; brain  
634 and/or nervous system development; abnormal nociception.

635

636 We compared the prevalence of psychiatric phenotypes in mutant mice for our SCZ-associated  
637 genes to the prevalence among other disease-associated gene sets. We selected 366 GWAS gene  
638 sets, and removed any for which fewer than ten mutant mouse models were included in our  
639 databases, leaving 105 gene sets. We compared the prevalence of 13 different categories of  
640 psychiatric phenotypes, relating to adrenal gland, behavior, brain development, craniofacial  
641 dysmorphology, ear/auditory phenotypes, eye dysmorphology, head dysmorphology, nervous  
642 system development, abnormal nociception, seizures, thyroid gland, vision phenotypes. For each  
643 GWAS gene set, we counted the number of categories with at least one phenotype, and  
644 compared to the number in our SCZ-associated gene set to obtain an empirical p-value.

645

### 646 **Data Availability**

647 Our CMC-derived DLPFC prediction models will be made publicly available.

648

## 649 **Acknowledgements**

650 Data were generated as part of the CommonMind Consortium supported by funding from Takeda  
651 Pharmaceuticals Company Limited, F. Hoffman-La Roche Ltd and NIH grants R01MH085542,  
652 R01MH093725, P50MH066392, P50MH080405, R01MH097276, RO1-MH-075916,  
653 P50M096891, P50MH084053S1, R37MH057881 and R37MH057881S1,  
654 HHSN271201300031C, AG02219, AG05138 and MH06692.

655  
656 Brain tissue for the study was obtained from the following brain bank collections: the Mount  
657 Sinai NIH Brain and Tissue Repository, the University of Pennsylvania Alzheimer's Disease  
658 Core Center, the University of Pittsburgh NeuroBioBank and Brain and Tissue Repositories and  
659 the NIMH Human Brain Collection Core. CMC Leadership: Pamela Sklar, Joseph Buxbaum  
660 (Icahn School of Medicine at Mount Sinai), Bernie Devlin, David Lewis (University of  
661 Pittsburgh), Raquel Gur, Chang-Gyu Hahn (University of Pennsylvania), Keisuke Hirai,  
662 Hiroyoshi Toyoshiba (Takeda Pharmaceuticals Company Limited), Enrico Domenici, Laurent  
663 Essioux (F. Hoffman-La Roche Ltd), Lara Mangravite, Mette Peters (Sage Bionetworks),  
664 Thomas Lehner, Barbara Lipska (NIMH).

665  
666 ROSMAP study data were provided by the Rush Alzheimer's Disease Center, Rush University  
667 Medical Center, Chicago. Data collection was supported through funding by NIA grants  
668 P30AG10161, R01AG15819, R01AG17917, R01AG30146, R01AG36836, U01AG32984,  
669 U01AG46152, the Illinois Department of Public Health, and the Translational Genomics  
670 Research Institute.

671  
672 The iPSYCH-GEMS team would like to acknowledge funding from the Lundbeck Foundation  
673 (grant no R102-A9118 and R155-2014-1724), the Stanley Medical Research Institute, an  
674 Advanced Grant from the European Research Council (project no: 294838), the Danish Strategic  
675 Research Council the Novo Nordisk Foundation for supporting the Danish National Biobank  
676 resource, and grants from Aarhus and Copenhagen Universities and University Hospitals,  
677 including support to the iSEQ Center, the GenomeDK HPC facility, and the CIRRAU Center.

678  
679



680 The Genotype-Tissue Expression (GTEx) Project was supported by the [Common Fund](#) of the  
681 Office of the Director of the National Institutes of Health, and by NCI, NHGRI, NHLBI, NIDA,  
682 NIMH, and NINDS. The data used for the analyses described in this manuscript were obtained  
683 from the [GTEx Portal](#) on 09/05/16. BrainSpan: Atlas of the Developing Human Brain [Internet].  
684 Funded by ARRA Awards 1RC2MH089921-01, 1RC2MH090047-01, and 1RC2MH089929-01.  
685  
686  
687

688 **CommonMind Consortium Working Group**

689

690 Jessica S Johnson 1, Hardik R Shah 2,3, Lambertus L Klein 4, Kristen K Dang 5, Benjamin A  
691 Logsdon 5, Milind C Mahajan 2,3, Lara M Mangravite 5, Hiroyoshi Toyoshiba 6, Raquel E Gur  
692 7, Chang-Gyu Hahn 8, Eric Schadt 2,3, David A Lewis 4, Vahram Haroutunian 1,5,9,10, Mette  
693 A Peters 5, Barbara K Lipska 11, Joseph D Buxbaum 1, 12, 13, Keisuke Hirai 14, Thanneer M  
694 Perumal 5, Laurent Essioux 15,

695

696 1. Division of Psychiatric Genomics, Department of Psychiatry, Icahn School of Medicine at  
697 Mount Sinai, New York, New York, USA

698 2. Institute for Genomics and Multiscale Biology, Icahn School of Medicine at Mount Sinai,  
699 New York, New York, USA

700 3. Department of Genetics and Genomic Sciences, Icahn School of Medicine at Mount Sinai,  
701 New York, New York, USA

702 4. Department of Psychiatry, University of Pittsburgh School of Medicine, Pittsburgh,  
703 Pennsylvania, USA

704 5. Sage Bionetworks, Seattle, Washington, USA

705 6. Integrated Technology Research Laboratories, Pharmaceutical Research Division, Takeda  
706 Pharmaceutical Company Limited, Fujisawa, Kanagawa, Japan

707 7. Neuropsychiatry Section, Department of Psychiatry, Perelman School of Medicine,  
708 University of Pennsylvania, Philadelphia, Pennsylvania, USA

709 8. Neuropsychiatric Signaling Program, Department of Psychiatry, Perelman School of  
710 Medicine, University of Pennsylvania, Philadelphia, Pennsylvania, USA

711 9. Psychiatry, JJ Peters Virginia Medical Center, Bronx, New York, USA.

712 10. Department of Neuroscience, Icahn School of Medicine at Mount Sinai, New York, New  
713 York, USA

714 11. Human Brain Collection Core, National Institutes of Health, NIMH, Bethesda, Maryland,  
715 USA

716 12. Friedman Brain Institute, Icahn School of Medicine at Mount Sinai, New York, New York,  
717 USA.

718 13. Seaver Autism Center for Research and Treatment, Icahn School of Medicine at Mount  
719 Sinai, New York, New York, USA

720 14. CNS Drug Discovery Unit, Pharmaceutical Research Division, Takeda Pharmaceutical  
721 Company Limited, Fujisawa, Kanagawa, Japan

722 15. F. Hoffman-La Roche Ltd

723

724

725

726

727

728

729

730

731

732

733 **iPSYCH-GEMS SCZ working group**

734

735 Anders D. Børghlum 1,2,3, Ditte Demontis 1,2,3, Veera Manikandan Rajagopal 1,2,3, Thomas D.  
736 Als 1,2,3, Manuel Mattheisen 1,2,3, Jakob Grove 1,2,3,4, Thomas Werge 1,7,8, Preben Bo  
737 Mortensen 1,2,9,10, Carsten Bøcker Pedersen 1,9,10, Esben Agerbo 1,9,10, Marianne Giørtz  
738 Pedersen 1, 9, 10, Ole Mors 1,6, Merete Nordentoft 1, 11, David M. Hougaard 1,5, Jonas  
739 Bybjerg-Grauholm 1,5, Marie Bækvad-Hansen 1,5, Christine Søholm Hansen 1,5

740

- 741 1. iPSYCH, The Lundbeck Foundation Initiative for Integrative Psychiatric Research,  
742 Denmark
- 743 2. iSEQ, Center for Integrative Sequencing, Aarhus University, Aarhus, Denmark
- 744 3. Department of Biomedicine - Human Genetics, Aarhus University, Aarhus, Denmark
- 745 4. Bioinformatics Research Centre, Aarhus University, Aarhus, Denmark
- 746 5. Center for Neonatal Screening, Department for Congenital Disorders, Statens Serum Institut,  
747 Copenhagen, Denmark
- 748 6. Psychosis Research Unit, Aarhus University Hospital, Risskov, Denmark
- 749 7. Institute of Biological Psychiatry, MHC Sct. Hans, Mental Health Services Copenhagen,  
750 Roskilde, Denmark
- 751 8. Department of Clinical Medicine, University of Copenhagen, Copenhagen, Denmark
- 752 9. National Centre for Register-Based Research, Aarhus University, Aarhus, Denmark
- 753 10. Centre for Integrated Register-based Research, Aarhus University, Aarhus, Denmark
- 754 11. Mental Health Services in the Capital Region of Denmark, Mental Health Center  
755 Copenhagen, University of Copenhagen, Copenhagen, Denmark

756

757 Potential Conflicts of Interest: TW has acted as advisor and lecturer to H. Lundbeck A/S

758

759

760

761 **Schizophrenia Working Group of the Psychiatric Genomics Consortium**

762 Stephan Ripke 1,2, Benjamin M. Neale1,2,3,4, Aiden Corvin 5, James T. R. Walters 6, Kai-How  
763 Farh1, Peter A. Holmans 6,7, Phil Lee1,2,4, Brendan Bulik-Sullivan1,2, David A. Collier 8,9,  
764 Hailiang Huang 1,3, Tune H. Pers 3,10,11, Ingrid Agartz 12,13,14, Esben Agerbo 15,16,17,  
765 Margot Albus 18, Madeline Alexander 19, Farooq Amin 20,21, Silviu A. Bacanu 22, Martin  
766 Begemann 23, Richard A. Belliveau Jr 2, Judit Bene 24,25, Sarah E. Bergen 2,26, Elizabeth  
767 Bevilacqua 2, Tim B. Bigdeli 22, Donald W. Black 27, Richard Bruggeman28, Nancy G.  
768 Buccola29, Randy L. Buckner30,31,32, William Byerley33, Wiepke Cahn34, Guiqing Cai35,36,  
769 DominiqueCampion37, Rita M. Cantor38, Vaughan J. Carr39,40, Noa Carrera6, Stanley V.  
770 Catts39,41, Kimberly D. Chambert2, Raymond C. K. Chan42, Ronald Y. L. Chen43, Eric Y. H.  
771 Chen43,44, Wei Cheng45, Eric F. C. Cheung46, Siow Ann Chong47, C. Robert Cloninger48,  
772 David Cohen49, Nadine Cohen50, Paul Cormican5, Nick Craddock6,7, James J. Crowley51,  
773 David Curtis52,53, Michael Davidson54, Kenneth L. Davis36, Franziska Degenhardt55,56,  
774 Jurgen Del Favero57, Ditte Demontis17,58,59, Dimitris Dikeos60, Timothy Dinan61, Srdjan  
775 Djurovic14,62, Gary Donohoe5,63, Elodie Drapeau36, Jubao Duan64,65, Frank Dudbridge66,  
776 Naser Durmishi67, Peter Eichhammer68, Johan Eriksson69,70,71, Valentina Escott-Price6,  
777 Laurent Essioux72, Ayman H. Fanous73,74,75,76, Martillas S. Farrell51, Josef Frank77, Lude  
778 Franke78, Robert Freedman79, Nelson B. Freimer80, Marion Friedl81, Joseph I. Friedman36,  
779 Menachem Fromer1,2,4,82, Giulio Genovese2, Lyudmila Georgieva6, Ina Giegling81,83, Paola  
780 Giusti-Rodri´guez51, Stephanie Godard84, Jacqueline I. Goldstein1,3, Vera Golimbet85, Srihari  
781 Gopal86, Jacob Gratten87, Lieuwe de Haan88, Christian Hammer23, Marian L. Hamshere6,  
782 Mark Hansen89, Thomas Hansen17,90, Vahram Haroutunian36,91,92, Annette M. Hartmann81,  
783 Frans A. Henskens39,93,94, Stefan Herms55,56,95, Joel N. Hirschhorn3,11,96, Per  
784 Hoffmann55,56,95, Andrea Hofman55,56, Mads V. Hollegaard97, David M. Hougaard97,  
785 Masashi Ikeda98, Inge Joa99, Antonio Julia 100, Rene S. Kahn34, Luba Kalaydjieva101,102,  
786 Sena Karachanak-Yankova103, Juha Karjalainen78, David Kavanagh6, Matthew C. Keller104,  
787 James L. Kennedy105,106,107, Andrey Khrunin108, Yunjung Kim51, Janis Klovins109, James  
788 A. Knowles110, Bettina Konte81, Vaidutis Kucinskas111, Zita Ausrele Kucinskiene111, Hana  
789 Kuzelova-Ptackova112, Anna K. Kahler26, Claudine Laurent19,113, Jimmy Lee Chee  
790 Keong47,114, S. Hong Lee87, Sophie E. Legge6, Bernard Lerer115, Miaoxin Li43,44,116, Tao  
791 Li17, Kung-Yee Liang118, Jeffrey Lieberman19, Svetlana Limborska108, Carmel M.  
792 Loughland39,120, Jan Lubinski121, Jouko Lonnqvist122, Milan Macek Jr112, Patrik K. E.  
793 Magnusson26, Brion S. Maher123, Wolfgang Maier124, Jacques Mallet125, Sara Marsal100,  
794 Manuel Mattheisen17,58,59,126, Morten Mattingsdal14,127, Robert W. McCarley128,129,  
795 ColmMcDonald130, Andrew M. McIntosh131,132, Sandra Meier77, Carin J. Meijer88, Bela  
796 Melegh24,25, Ingrid Melle14,133, Raquelle I. Mesholam-Gately128,134, Andres Metspalu135,  
797 Patricia T. Michie39,136, Lili Milani135, Vihra Milanova137, Younes Mokrab8, Derek W.  
798 Morris5,63, Ole Mors17,58,138, Kieran C. Murphy139, Robin M. Murray140, Inez Myin-  
799 Germeys141, Bertram Muller-Myhsok142,143,144, Mari Nelis135, Igor Nenadic145, Deborah  
800 A. Nertney146, Gerald Nestadt147, Kristin K. Nicodemus148, Liene Nikitina-Zake109, Laura

801 Nisenbaum149, Annelie Nordin150, Eadbhard O’Callaghan151, Colm O’Dushlaine2, F. Anthony  
802 O’Neill152, Sang-Yun Oh153, Ann Olincy79, Line Olsen17,90, Jim Van Os141,154, Psychosis  
803 Endophenotypes International Consortium155, Christos Pantelis39,156, George N.  
804 Papadimitriou 60, Sergi Papiol 23, Elena Parkhomenko36, Michele T. Pato110, Tiina  
805 Paunio157,158, Milica Pejovic-Milovancevic159, Diana O. Perkins160, Olli Pietiläinen158,161,  
806 Jonathan Pimm53, Andrew J. Pocklington6, John Powell140, Alkes Price3,162, Ann E. Pulver  
807 147, Shaun M. Purcell 82, Digby Quested 163, Henrik B. Rasmussen 17,90, Abraham  
808 Reichenberg36, Mark A. Reimers164, Alexander L. Richards6, Joshua L. Roffman30,32, Panos  
809 Roussos82,165, Douglas M. Ruderfer6,82, Veikko Salomaa71, Alan R. Sanders64,65, Ulrich  
810 Schall39,120, Christian R. Schubert166, Thomas G. Schulze77,167, Sibylle G. Schwab168,  
811 Edward M. Scolnick2, Rodney J. Scott39,169,170, Larry J. Seidman128,134, Jianxin Shi171,  
812 Engilbert Sigurdsson172, Teimuraz Silagadze173, Jeremy M. Silverman36,174, Kang Sim47,  
813 Petr Slominsky108, Jordan W. Smoller2,4, Hon-Cheong So43, Chris C. A. Spencer175, Eli A.  
814 Stahl3,82, Hreinn Stefansson176, Stacy Steinberg176, Elisabeth Stogmann177, Richard E.  
815 Straub178, Eric Strengman179,34, Jana Strohmaier77, T. Scott Stroup119, Mythily  
816 Subramaniam47, Jaana Suvisaari122, Dragan M. Svrakic48, Jin P. Szatkiewicz51, Erik  
817 Soderman12, Srinivas Thirumalai180, Draga Toncheva103, Sarah Tosato181,  
818 Juha Veijola182,183, John Waddington184, Dermot Walsh185, Dai Wang86, Qiang Wang117,  
819 Bradley T. Webb22, Mark Weiser54, Dieter B. Wildenauer186, Nigel M. Williams6, Stephanie  
820 Williams51, Stephanie H. Witt77, Aaron R. Wolen164, Emily H. M. Wong43, Brandon K.  
821 Wormley22, Hualin Simon Xi187, Clement C. Zai105,106, Xuebin Zheng188, Fritz  
822 Zimprich177, Naomi R. Wray87, Kari Stefansson176, Peter M. Visscher87, Wellcome Trust  
823 Case-Control Consortium 2189, Rolf Adolfsson150, Ole A. Andreassen14,133, Douglas H. R.  
824 Blackwood132, Elvira Bramon190, Joseph D. Buxbaum35,36,91,191, Anders D.  
825 Børglum17,58,59,138, Sven Cichon55,56,95,192, Ariel Darvasi193, Enrico Domenici194,  
826 Hannelore Ehrenreich23, Tonu Esko3,11,96,135, Pablo V. Gejman64,65, Michael Gill5,  
827 Hugh Gurling53, Christina M. Hultman26, Nakao Iwata98, Assen V. Jablensky39,102,186,195,  
828 Erik G. Jonsson12,14, Kenneth S. Kendler196, George Kirov6, Jo Knight105,106,107,  
829 Todd Lencz197,198,199, Douglas F. Levinson19, Qing Qin S. Li86, Jianjun Liu188,200, Anil K.  
830 Malhotra197,198,199, Steven A. McCarroll2,96, Andrew McQuillin53, Jennifer L. Moran2,  
831 Preben B. Mortensen15,16,17, Bryan J. Mowry87,201, Markus M. Nothen55,56, Roel A.  
832 Ophoff38,80,34, Michael J. Owen6,7, Aarno Palotie2,4,161, Carlos N. Pato110, Tracey L.  
833 Petryshen2,128,202, Danielle Posthuma203,204,205, Marcella Rietschel77, Brien P. Riley196,  
834 Dan Rujescu81,83, Pak C. Sham43,44,116, Pamela Sklar 82,91,165, David St Clair206, Daniel  
835 R. Weinberger178,207, Jens R. Wendland166, Thomas Werge 17,90,208, Mark J. Daly1,2,3,  
836 Patrick F. Sullivan 26,51,160 & Michael C. O’Donovan 6,7  
837  
838 1. Analytic and Translational Genetics Unit, Massachusetts General Hospital, Boston,  
839 Massachusetts 02114, USA. 2. Stanley Center for Psychiatric Research, Broad Institute of MIT  
840 and Harvard, Cambridge, Massachusetts 02142, USA. 3. Medical and Population Genetics

841 Program, Broad Institute of MIT and Harvard, Cambridge, Massachusetts 02142, USA. 4.  
842 Psychiatric and Neurodevelopmental Genetics Unit, Massachusetts General Hospital, Boston,  
843 Massachusetts 02114, USA. 5. Neuropsychiatric Genetics Research Group, Department of  
844 Psychiatry, Trinity College Dublin, Dublin 8, Ireland. 6. MRC Centre for Neuropsychiatric  
845 Genetics and Genomics, Institute of Psychological Medicine and Clinical Neurosciences, School  
846 of Medicine, Cardiff University, Cardiff CF24 4HQ, UK. 7. National Centre for Mental Health,  
847 Cardiff University, Cardiff CF244HQ, UK. 8. Eli Lilly and Company Limited, Erl Wood Manor,  
848 Sunninghill Road, Windlesham, Surrey GU20 6PH, UK. 9. Social, Genetic and Developmental  
849 Psychiatry Centre, Institute of Psychiatry, King's College London, London SE58AF, UK. 10.  
850 Center for Biological Sequence Analysis, Department of Systems Biology, Technical University  
851 of Denmark, DK-2800, Denmark. 11. Division of Endocrinology and Center for Basic and  
852 Translational Obesity Research, Boston Children's Hospital, Boston, Massachusetts 02115, USA.  
853 12. Department of Clinical Neuroscience, Psychiatry Section, Karolinska Institutet, SE-17176  
854 Stockholm, Sweden. 13. Department of Psychiatry, Diakonhjemmet Hospital, 0319 Oslo,  
855 Norway. 14. NORMENT, KG Jebsen Centre for Psychosis Research, Institute of Clinical  
856 Medicine, University of Oslo, 0424 Oslo, Norway. 15. Centre for Integrative Register-based  
857 Research, CIRRAU, Aarhus University, DK-8210 Aarhus, Denmark. 16. National Centre for  
858 Register-based Research, Aarhus University, DK-8210 Aarhus, Denmark. 17. The Lundbeck  
859 Foundation Initiative for Integrative Psychiatric Research, iPSYCH, Denmark. 18. State Mental  
860 Hospital, 85540 Haar, Germany. 19. Department of Psychiatry and Behavioral Sciences,  
861 Stanford University, Stanford, California 94305, USA. 20. Department of Psychiatry and  
862 Behavioral Sciences, Atlanta Veterans Affairs Medical Center, Atlanta, Georgia 30033, USA.  
863 21. Department of Psychiatry and Behavioral Sciences, Emory University, Atlanta, Georgia  
864 30322, USA. 22. Virginia Institute for Psychiatric and Behavioral Genetics, Department of  
865 Psychiatry, Virginia Commonwealth University, Richmond, Virginia 23298, USA. 23. Clinical  
866 Neuroscience, Max Planck Institute of Experimental Medicine, Gottingen 37075, Germany. 24.  
867 Department of Medical Genetics, University of Pécs, Pécs H-7624, Hungary. 25. Szentagothai  
868 Research Center, University of Pécs, Pécs H-7624, Hungary. 26. Department of Medical  
869 Epidemiology and Biostatistics, Karolinska Institutet, Stockholm SE-17177, Sweden. 27.  
870 Department of Psychiatry, University of Iowa Carver College of Medicine, Iowa City, Iowa  
871 52242, USA. 28. University Medical Center Groningen, Department of Psychiatry, University of  
872 Groningen NL-9700 RB, The Netherlands. 29. School of Nursing, Louisiana State University  
873 Health Sciences Center, New Orleans, Louisiana 70112, USA. 30. Athinoula A. Martinos  
874 Center, Massachusetts General Hospital, Boston, Massachusetts 02129, USA. 31. Center for  
875 Brain Science, Harvard University, Cambridge, Massachusetts 02138, USA. 32. Department of  
876 Psychiatry, Massachusetts General Hospital, Boston, Massachusetts 02114, USA. 33.  
877 Department of Psychiatry, University of California at San Francisco, San Francisco, California  
878 94143, USA. 34. University Medical Center Utrecht, Department of Psychiatry, Rudolf Magnus  
879 Institute of Neuroscience, 3584 Utrecht, The Netherlands. 35. Department of Human

880 Genetics, Icahn School of Medicine at Mount Sinai, New York, New York 10029, USA. 36.  
881 Department of Psychiatry, Icahn School of Medicine at Mount Sinai, New York, New York  
882 10029, USA. 37. Centre Hospitalier du Rouvray and INSERM U1079 Faculty of Medicine,  
883 76301 Rouen, France. 38. Department of Human Genetics, David Geffen School of Medicine,  
884 University of California, Los Angeles, California 90095, USA. 39. Schizophrenia Research  
885 Institute, Sydney NSW2010, Australia. 40. School of Psychiatry, University of New  
886 South Wales, Sydney NSW2031, Australia. 41. Royal Brisbane and Women's Hospital,  
887 University of Queensland, Brisbane, St Lucia QLD 4072, Australia. 42. Institute of Psychology,  
888 Chinese Academy of Science, Beijing 100101, China. 43. Department of Psychiatry, Li Ka Shing  
889 Faculty of Medicine, The University of Hong Kong, Hong Kong, China. 44. State Key  
890 Laboratory for Brain and Cognitive Sciences, Li Ka Shing Faculty of Medicine, The University  
891 of Hong Kong, Hong Kong, China. 45. Department of Computer Science, University of North  
892 Carolina, Chapel Hill, North Carolina 27514, USA. 46. Castle Peak Hospital, Hong Kong, China.  
893 47. Institute of Mental Health, Singapore 539747, Singapore. 48. Department of Psychiatry,  
894 Washington University, St. Louis, Missouri 63110, USA. 49. Department of Child and  
895 Adolescent Psychiatry, Assistance Publique Hopitaux de Paris, Pierre and Marie Curie Faculty of  
896 Medicine and Institute for Intelligent Systems and Robotics, Paris 75013, France. 50. Blue Note  
897 Biosciences, Princeton, New Jersey 08540, USA. 51. Department of Genetics, University of  
898 North Carolina, Chapel Hill, North Carolina 27599-7264, USA. 52. Department of Psychological  
899 Medicine, Queen Mary University of London, London E1 1BB, UK. 53. Molecular Psychiatry  
900 Laboratory, Division of Psychiatry, University College London, London WC1E6JJ, UK. 54.  
901 Sheba Medical Center, Tel Hashomer 52621, Israel. 55. Department of Genomics, Life and Brain  
902 Center, D-53127 Bonn, Germany. 56. Institute of Human Genetics, University of Bonn, D-53127  
903 Bonn, Germany. 57. Applied Molecular Genomics Unit, VIB Department of Molecular Genetics,  
904 University of Antwerp, B-2610 Antwerp, Belgium. 58. Centre for Integrative Sequencing, iSEQ,  
905 Aarhus University, DK-8000 Aarhus C, Denmark. 59. Department of Biomedicine, Aarhus  
906 University, DK-8000 Aarhus C, Denmark. 60. First Department of Psychiatry, University of  
907 Athens Medical School, Athens 11528, Greece. 61. Department of Psychiatry, University  
908 College Cork, Co. Cork, Ireland. 62. Department of Medical Genetics, Oslo University Hospital,  
909 0424 Oslo, Norway. 63. Cognitive Genetics and Therapy Group, School of Psychology and  
910 Discipline of Biochemistry, National University of Ireland Galway, Co. Galway, Ireland. 64.  
911 Department of Psychiatry and Behavioral Neuroscience, University of Chicago, Chicago, Illinois  
912 60637, USA. 65. Department of Psychiatry and Behavioral Sciences, North Shore University  
913 Health System, Evanston, Illinois 60201, USA. 66. Department of Non-Communicable Disease  
914 Epidemiology, London School of Hygiene and Tropical Medicine, London WC1E 7HT, UK. 67.  
915 Department of Child and Adolescent Psychiatry, University Clinic of Psychiatry, Skopje 1000,  
916 Republic of Macedonia. 68. Department of Psychiatry, University of Regensburg, 93053  
917 Regensburg, Germany. 69. Department of General Practice, Helsinki University Central Hospital,  
918 University of Helsinki P.O. Box 20, Tukholmankatu 8 B, FI-00014, Helsinki, Finland 70.  
919 Folkhälsan Research Center, Helsinki, Finland, Biomedicum Helsinki 1, Haartmaninkatu 8, FI-

920 00290, Helsinki, Finland. 71. National Institute for Health and Welfare, P.O. Box 30, FI-00271  
921 Helsinki, Finland. 72. Translational Technologies and Bioinformatics, Pharma Research  
922 and Early Development, F. Hoffman-La Roche, CH-4070 Basel, Switzerland. 73. Department of  
923 Psychiatry, Georgetown University School of Medicine, Washington DC 20057, USA. 74.  
924 Department of Psychiatry, Keck School of Medicine of the University of Southern California,  
925 Los Angeles, California 90033, USA. 75. Department of Psychiatry, Virginia Commonwealth  
926 University School of Medicine, Richmond, Virginia 23298, USA. 76. Mental Health Service  
927 Line, Washington VA Medical Center, Washington DC 20422, USA. 77. Department of Genetic  
928 Epidemiology in Psychiatry, Central Institute of Mental Health, Medical Faculty Mannheim,  
929 University of Heidelberg, Heidelberg , D-68159 Mannheim, Germany. 78. Department of  
930 Genetics, University of Groningen, University Medical Centre Groningen, 9700 RB Groningen,  
931 The Netherlands. 79. Department of Psychiatry, University of Colorado Denver, Aurora,  
932 Colorado 80045, USA. 80. Center for Neurobehavioral Genetics, Semel Institute for  
933 Neuroscience and Human Behavior, University of California, Los Angeles, California 90095,  
934 USA. 81. Department of Psychiatry, University of Halle, 06112 Halle, Germany. 82. Division of  
935 Psychiatric Genomics, Department of Psychiatry, Icahn School of Medicine at Mount Sinai, New  
936 York, New York 10029, USA. 83. Department of Psychiatry, University of Munich, 80336,  
937 Munich, Germany. 84. Departments of Psychiatry and Human and Molecular Genetics,  
938 INSERM, Institut de Myologie, Hôpital de la Pitié-Salpêtrière, Paris 75013, France. 85. Mental  
939 Health Research Centre, Russian Academy of Medical Sciences, 115522 Moscow, Russia. 86.  
940 Neuroscience Therapeutic Area, Janssen Research and Development, Raritan, New  
941 Jersey 08869, USA. 87. Queensland Brain Institute, The University of Queensland, Brisbane,  
942 Queensland, QLD 4072, Australia. 88. Academic Medical Centre University of Amsterdam,  
943 Department of Psychiatry, 1105 AZ Amsterdam, The Netherlands. 89. Illumina, La Jolla,  
944 California, California 92122, USA. 90. Institute of Biological Psychiatry, Mental Health Centre  
945 Sct.Hans, Mental Health Services Copenhagen, DK-4000, Denmark. 91. Friedman Brain  
946 Institute, Icahn School of Medicine at Mount Sinai, New York, New York 10029, USA. 92. J. J.  
947 Peters VA Medical Center, Bronx, New York, New York 10468, USA. 93. Priority Research  
948 Centre for Health Behaviour, University of Newcastle, Newcastle NSW 2308, Australia. 94.  
949 School of Electrical Engineering and Computer Science, University of Newcastle, Newcastle  
950 NSW2308, Australia. 95. Division of Medical Genetics, Department of Biomedicine, University  
951 of Basel, Basel CH-4058, Switzerland. 96. Department of Genetics, Harvard Medical School,  
952 Boston, Massachusetts, Massachusetts 02115, USA. 97. Section of Neonatal Screening and  
953 Hormones, Department of Clinical Biochemistry, Immunology and Genetics, Statens Serum  
954 Institut, Copenhagen DK-2300, Denmark. 98. Department of Psychiatry, Fujita Health  
955 University School of Medicine, Toyoake, Aichi, 470-1192, Japan. 99. Regional Centre for  
956 Clinical Research in Psychosis, Department of Psychiatry, Stavanger University Hospital, 4011  
957 Stavanger, Norway. 100. Rheumatology Research Group, Vall d'Hebron Research Institute,  
958 Barcelona 08035, Spain. 101. Centre for Medical Research, The University of Western Australia,  
959 Perth WA6009, Australia. 102. The Perkins Institute for Medical Research, The University of



960 Western Australia, Perth WA6009, Australia. 103. Department of Medical Genetics, Medical  
961 University, Sofia 1431, Bulgaria. 104. Department of Psychology, University of Colorado  
962 Boulder, Boulder, Colorado 80309, USA. 105. Campbell Family Mental Health Research  
963 Institute, Centre for Addiction and Mental Health, Toronto, Ontario M5T 1R8, Canada. 106.  
964 Department of Psychiatry, University of Toronto, Toronto, Ontario M5T 1R8, Canada. 107.  
965 Institute of Medical Science, University of Toronto, Toronto, Ontario M5S1A8, Canada. 108.  
966 Institute of Molecular Genetics, Russian Academy of Sciences, Moscow 123182, Russia. 109.  
967 Latvian Biomedical Research and Study Centre, Riga, LV-1067, Latvia. 110. Department of  
968 Psychiatry and Zilkha Neurogenetics Institute, Keck School of Medicine at University of  
969 Southern California, Los Angeles, California 90089, USA. 111. Faculty of Medicine, Vilnius  
970 University, LT-01513 Vilnius, Lithuania. 112. Department of Biology and Medical Genetics,  
971 2nd Faculty of Medicine and University Hospital Motol, 150 06 Prague, Czech Republic. 113.  
972 Department of Child and Adolescent Psychiatry, Pierre and Marie Curie Faculty of Medicine,  
973 Paris 75013, France. 114. Duke-NUS Graduate Medical School, Singapore 169857. 115.  
974 Department of Psychiatry, Hadassah-Hebrew University Medical Center, Jerusalem 91120,  
975 Israel. 116. Centre for Genomic Sciences, The University of Hong Kong, Hong Kong, China.  
976 117. Mental Health Centre and Psychiatric Laboratory, West China Hospital, Sichuan  
977 University, Chengdu, 610041 Sichuan, China. 118. Department of Biostatistics, Johns Hopkins  
978 University Bloomberg School of Public Health, Baltimore, Maryland 21205, USA. 119.  
979 Department of Psychiatry, Columbia University, New York, New York 10032, USA. 120.  
980 Priority Centre for Translational Neuroscience and Mental Health, University of Newcastle,  
981 Newcastle NSW 2300, Australia. 121. Department of Genetics and Pathology, International  
982 Hereditary Cancer Center, Pomeranian Medical University in Szczecin, 70-453 Szczecin,  
983 Poland. 122. Department of Mental Health and Substance Abuse Services; National Institute for  
984 Health and Welfare, P.O.BOX30, FI-00271 Helsinki, Finland. 123. Department of Mental Health,  
985 Bloomberg School of Public Health, Johns Hopkins University, Baltimore, Maryland 21205,  
986 USA. 124. Department of Psychiatry, University of Bonn, D-53127 Bonn, Germany. 125. Centre  
987 National de la Recherche Scientifique, Laboratoire de Génétique Moléculaire de la  
988 Neurotransmission et des Processus Neurodénégatifs, Hôpital de la Pitié-Salpêtrière 75013  
989 Paris, France. 126. Department of Genomics Mathematics, University of Bonn, D-53127 Bonn,  
990 Germany. 127. Research Unit, Sørlandet Hospital, 4604 Kristiansand, Norway. 128. Department  
991 of Psychiatry, Harvard Medical School, Boston, Massachusetts 02115, USA. 129. VA Boston  
992 Health Care System, Brockton, Massachusetts 02301, USA. 130. Department of Psychiatry,  
993 National University of Ireland Galway, Co. Galway, Ireland. 131. Centre for Cognitive Ageing  
994 and Cognitive Epidemiology, University of Edinburgh, Edinburgh EH16 4SB, UK. 132. Division  
995 of Psychiatry, University of Edinburgh, Edinburgh EH16 4SB, UK. 133. Division of Mental  
996 Health and Addiction, Oslo University Hospital, 0424 Oslo, Norway. 134. Massachusetts Mental  
997 Health Center Public Psychiatry Division of the Beth Israel Deaconess Medical Center, Boston,  
998 Massachusetts 02114, USA. 135. Estonian Genome Center, University of Tartu, Tartu 50090,  
999 Estonia. 136. School of Psychology, University of Newcastle, Newcastle NSW2308, Australia.

1000 137. First Psychiatric Clinic, Medical University, Sofia 1431, Bulgaria. 138. Department P,  
1001 Aarhus University Hospital, DK-8240 Risskov, Denmark. 139. Department of Psychiatry, Royal  
1002 College of Surgeons in Ireland, Dublin 2, Ireland. 140. King's College London, London  
1003 SE58AF, UK. 141. Maastricht University Medical Centre, South Limburg Mental Health  
1004 Research and Teaching Network, EURON, 6229HX Maastricht, The Netherlands. 142. Institute of  
1005 Translational Medicine, University of Liverpool, Liverpool L69 3BX, UK. 143. Max Planck  
1006 Institute of Psychiatry, 80336 Munich, Germany. 144. Munich Cluster for Systems Neurology  
1007 (SyNergy), 80336 Munich, Germany. 145. Department of Psychiatry and Psychotherapy, Jena  
1008 University Hospital, 07743 Jena, Germany. 146. Department of Psychiatry, Queensland Brain  
1009 Institute and Queensland Centre for Mental Health Research, University of Queensland,  
1010 Brisbane, Queensland, St Lucia QLD 4072, Australia. 147. Department of Psychiatry and  
1011 Behavioral Sciences, Johns Hopkins University School of Medicine, Baltimore, Maryland  
1012 21205, USA. 148. Department of Psychiatry, Trinity College Dublin, Dublin 2, Ireland. 149. Eli  
1013 Lilly and Company, Lilly Corporate Center, Indianapolis, 46285 Indiana, USA. 150. Department  
1014 of Clinical Sciences, Psychiatry, Umeå University, SE-901 87 Umeå, Sweden. 151. DETECT  
1015 Early Intervention Service for Psychosis, Blackrock, Co. Dublin, Ireland. 152. Centre for Public  
1016 Health, Institute of Clinical Sciences, Queen's University Belfast, Belfast BT12 6AB, UK. 153.  
1017 Lawrence Berkeley National Laboratory, University of California at Berkeley, Berkeley,  
1018 California 94720, USA. 154. Institute of Psychiatry, King's College London, London SE5  
1019 8AF, UK. 155. A list of authors and affiliations appear in the Supplementary Information. 156.  
1020 Melbourne Neuropsychiatry Centre, University of Melbourne & Melbourne Health, Melbourne,  
1021 Vic 3053, Australia. 157. Department of Psychiatry, University of Helsinki, P.O. Box 590, FI-  
1022 00029 HUS, Helsinki, Finland. 158. Public Health Genomics Unit, National Institute for Health  
1023 and Welfare, P.O. BOX 30, FI-00271 Helsinki, Finland. 159. Medical Faculty, University of  
1024 Belgrade, 11000 Belgrade, Serbia. 160. Department of Psychiatry, University of North Carolina,  
1025 Chapel Hill, North Carolina 27599-7160, USA. 161. Institute for Molecular Medicine Finland,  
1026 FIMM, University of Helsinki, P.O. Box 20FI-00014, Helsinki, Finland. 162. Department of  
1027 Epidemiology, Harvard School of Public Health, Boston, Massachusetts 02115, USA. 163.  
1028 Department of Psychiatry, University of Oxford, Oxford, OX3 7JX, UK. 164. Virginia Institute  
1029 for Psychiatric and Behavioral Genetics, Virginia Commonwealth University, Richmond,  
1030 Virginia 23298, USA. 165. Institute for Multiscale Biology, Icahn School of Medicine at Mount  
1031 Sinai, New York, New York 10029, USA. 166. Pharma Therapeutics Clinical Research, Pfizer  
1032 Worldwide Research and Development, Cambridge, Massachusetts 02139, USA. 167.  
1033 Department of Psychiatry and Psychotherapy, University of Göttingen, 37073 Göttingen,  
1034 Germany. 168. Psychiatry and Psychotherapy Clinic, University of Erlangen, 91054 Erlangen,  
1035 Germany. 169. Hunter New England Health Service, Newcastle NSW2308, Australia. 170. School  
1036 of Biomedical Sciences, University of Newcastle, Newcastle NSW2308, Australia. 171. Division  
1037 of Cancer Epidemiology and Genetics, National Cancer Institute, Bethesda, Maryland 20892,  
1038 USA. 172. University of Iceland, Landspítali, National University Hospital, 101 Reykjavik,  
1039 Iceland. 173. Department of Psychiatry and Drug Addiction, Tbilisi State Medical University

1040 (TSMU), N33,0177 Tbilisi, Georgia. 174. Research and Development, Bronx Veterans Affairs  
1041 Medical Center, New York, New York 10468, USA. 175. WellcomeTrust Centre for Human  
1042 Genetics, Oxford OX3 7BN, UK. 176. deCODE Genetics, 101 Reykjavik, Iceland. 177/  
1043 Department of Clinical Neurology, Medical University of Vienna, 1090 Wien, Austria. 178.  
1044 Lieber Institute for Brain Development, Baltimore, Maryland 21205, USA. 179. Department of  
1045 Medical Genetics, University Medical Centre Utrecht, Universiteitsweg 100,3584CG, Utrecht,  
1046 The Netherlands. 180. Berkshire Healthcare NHS Foundation Trust, Bracknell RG12 1BQ, UK.  
1047 181. Section of Psychiatry, University of Verona, 37134 Verona, Italy. 182. Department of  
1048 Psychiatry, University of Oulu, P.O. Box 5000, 90014, Finland. 183. University Hospital of  
1049 Oulu, P.O. Box 20, 90029 OYS, Finland. 184. Molecular and Cellular Therapeutics, Royal  
1050 College of Surgeons in Ireland, Dublin 2, Ireland. 185. Health Research Board, Dublin 2,  
1051 Ireland. 186. School of Psychiatry and Clinical Neurosciences, The University of Western  
1052 Australia, Perth WA6009, Australia. 187. Computational Sciences CoE, Pfizer Worldwide  
1053 Research and Development, Cambridge, Massachusetts 02139, USA. 188. Human Genetics,  
1054 Genome Institute of Singapore, A\*STAR, Singapore 138672. 189. A list of authors and  
1055 affiliations appear in the Supplementary Information. 190. University College London, London  
1056 WC1E 6BT, UK. 191. Department of Neuroscience, Icahn School of Medicine at Mount  
1057 Sinai, New York, New York 10029, USA. 192. Institute of Neuroscience and Medicine (INM-1),  
1058 Research Center Juelich, 52428 Juelich, Germany. 193. Department of Genetics, The Hebrew  
1059 University of Jerusalem, 91905 Jerusalem, Israel. 194. Neuroscience Discovery and Translational  
1060 Area, Pharma Research and Early Development, F. Hoffman-La Roche, CH-4070 Basel,  
1061 Switzerland. 195. Centre for Clinical Research in Neuropsychiatry, School of Psychiatry and  
1062 Clinical Neurosciences, The University of Western Australia, Medical Research Foundation  
1063 Building, Perth WA6000, Australia. 196. Virginia Institute for Psychiatric and Behavioral  
1064 Genetics, Departments of Psychiatry and Human and Molecular Genetics, Virginia  
1065 Commonwealth University, Richmond, Virginia 23298, USA. 197. The Feinstein Institute for  
1066 Medical Research, Manhasset, New York 11030, USA. 198. The Hofstra NS-LIJ School of  
1067 Medicine, Hempstead, New York 11549, USA. 199. The Zucker Hillside Hospital, Glen Oaks,  
1068 New York 11004, USA. 200. Saw Swee Hock School of Public Health, National University of  
1069 Singapore, Singapore 117597, Singapore. 201. Queensland Centre for Mental Health Research,  
1070 University of Queensland, Brisbane 4076, Queensland, Australia. 202. Center for Human Genetic  
1071 Research and Department of Psychiatry, Massachusetts General Hospital, Boston, Massachusetts  
1072 02114, USA. 203. Department of Child and Adolescent Psychiatry, Erasmus University Medical  
1073 Centre, Rotterdam 3000, The Netherlands. 204. Department of Complex Trait Genetics,  
1074 Neuroscience Campus Amsterdam, VU University Medical Center Amsterdam,  
1075 Amsterdam 1081, The Netherlands. 205. Department of Functional Genomics, Center for  
1076 Neurogenomics and Cognitive Research, Neuroscience Campus Amsterdam, VU University,  
1077 Amsterdam 1081, The Netherlands. 206. University of Aberdeen, Institute of Medical Sciences,  
1078 Aberdeen AB25 2ZD, UK. 207. Departments of Psychiatry, Neurology, Neuroscience and  
1079 Institute of Genetic Medicine, Johns Hopkins School of Medicine, Baltimore, Maryland 21205,

1080 USA. 208. Department of Clinical Medicine, University of Copenhagen, Copenhagen 2200,  
1081 Denmark.

1082 **References**

- 1083 1. Nicolae, D. L. *et al.* Trait-Associated SNPs Are More Likely to Be eQTLs: Annotation to  
1084 Enhance Discovery from GWAS. *PLoS Genet.* **6**, e1000888 (2010).
- 1085 2. Dobbyn, A. *et al.* Co-localization of Conditional eQTL and GWAS Signatures in  
1086 Schizophrenia. *Rev.* (2017).
- 1087 3. Gilad, Y., Rifkin, S. A. & Pritchard, J. K. Revealing the architecture of gene regulation:  
1088 the promise of eQTL studies. *Trends Genet.* **24**, 408–415 (2008).
- 1089 4. Cookson, W., Liang, L., Abecasis, G., Moffatt, M. & Lathrop, M. Mapping complex  
1090 disease traits with global gene expression. *Nat. Rev. Genet.* **10**, 184–194 (2009).
- 1091 5. Albert, F. W. & Kruglyak, L. The role of regulatory variation in complex traits and  
1092 disease. *Nat. Rev. Genet.* **16**, 197–212 (2015).
- 1093 6. Moffatt, M. F. *et al.* Genetic variants regulating ORMDL3 expression contribute to the  
1094 risk of childhood asthma. *Nature* **448**, 470–473 (2007).
- 1095 7. Speliotes, E. K. *et al.* Association analyses of 249,796 individuals reveal 18 new loci  
1096 associated with body mass index. *Nat. Genet.* **42**, 937–948 (2010).
- 1097 8. Dubois, P. C. A. *et al.* Multiple common variants for celiac disease influencing immune  
1098 gene expression. *Nat. Genet.* **42**, 295–302 (2010).
- 1099 9. Libioulle, C. *et al.* Novel Crohn disease locus identified by genome-wide association  
1100 maps to a gene desert on 5p13.1 and modulates expression of PTGER4. *PLoS Genet.* **3**,  
1101 e58 (2007).
- 1102 10. Giambartolomei, C. *et al.* Bayesian Test for Colocalisation between Pairs of Genetic  
1103 Association Studies Using Summary Statistics. *PLoS Genet.* **10**, e1004383 (2014).
- 1104 11. Boocock, J., Giambartolomei, C. & Stahl, E. A. COLOC2. (2016).
- 1105 12. Zhu, Z. *et al.* Integration of summary data from GWAS and eQTL studies predicts  
1106 complex trait gene targets. *Nat. Genet.* **48**, 481–487 (2016).
- 1107 13. Pickrell, J. K. *et al.* Detection and interpretation of shared genetic influences on 42 human  
1108 traits. *Nat. Genet.* **48**, 709–717 (2016).
- 1109 14. Fromer, M. *et al.* Gene expression elucidates functional impact of polygenic risk for  
1110 schizophrenia. *Nat. Neurosci.* **19**, 1442–1453 (2016).
- 1111 15. Gamazon, E. R. *et al.* A gene-based association method for mapping traits using reference  
1112 transcriptome data. *Nat. Genet.* **47**, 1091–8 (2015).

- 1113 16. Gusev, A. *et al.* Integrative approaches for large-scale transcriptome-wide association  
1114 studies. *Nat. Genet.* **48**, 245–52 (2016).
- 1115 17. Geschwind, D. H. & Flint, J. Genetics and genomics of psychiatric disease. *Science* (80-  
1116 ). **349**, (2015).
- 1117 18. Leek, J. T., Johnson, W. E., Parker, H. S., Jaffe, A. E. & Storey, J. D. The sva package for  
1118 removing batch effects and other unwanted variation in high-throughput experiments.  
1119 *Bioinformatics* **28**, 882–3 (2012).
- 1120 19. A. Bennett, D., A. Schneider, J., Arvanitakis, Z. & S. Wilson, R. Overview and Findings  
1121 from the Religious Orders Study. *Curr. Alzheimer Res.* **9**, 628–645 (2012).
- 1122 20. Mele, M. *et al.* The human transcriptome across tissues and individuals. *Science* (80-  
1123 ). **348**, 660–665 (2015).
- 1124 21. (GTEx Consortium). GTEx Portal. (2015). at  
1125 <<http://gtexportal.org/home/documentationPage>>
- 1126 22. Ripke, S. *et al.* Biological insights from 108 schizophrenia-associated genetic loci. *Nature*  
1127 **511**, 421–427 (2014).
- 1128 23. Benjamin, Y. & Hochberg, Y. Controlling the False Discovery Rate: a Practical and  
1129 Powerful Approach to Multiple Testing. *Journal of the Royal Statistical Society* 289–300  
1130 (1995).
- 1131 24. Darnell, J. C. *et al.* FMRP stalls ribosomal translocation on mRNAs linked to synaptic  
1132 function and autism. *Cell* **146**, 247–61 (2011).
- 1133 25. Fromer, M. *et al.* *Gene Expression Elucidates Functional Impact of Polygenic Risk for*  
1134 *Schizophrenia*. *bioRxiv* (Cold Spring Harbor Labs Journals, 2016). doi:10.1101/052209
- 1135 26. Pardiñas, A. F. *et al.* Common schizophrenia alleles are enriched in mutation-intolerant  
1136 genes and maintained by background selection. *bioRxiv* 68593 (2016).  
1137 doi:10.1101/068593
- 1138 27. Sanders, S. J. First glimpses of the neurobiology of autism spectrum disorder. *Curr. Opin.*  
1139 *Genet. Dev.* **33**, 80–92 (2015).
- 1140 28. Exome Aggregation Consortium *et al.* *Analysis of protein-coding genetic variation in*  
1141 *60,706 humans*. *bioRxiv* (Cold Spring Harbor Labs Journals, 2015). doi:10.1101/030338
- 1142 29. Malhotra, D. *et al.* High frequencies of de novo CNVs in bipolar disorder and  
1143 schizophrenia. *Neuron* **72**, 951–963 (2011).

- 1144 30. Bautista, O., Vázquez-Caubet, J. C., Zhivago, E. A. & Dolores Sáiz, M. From metabolism  
1145 to psychiatric symptoms: psychosis as a manifestation of acute intermittent porphyria. *J.*  
1146 *Neuropsychiatry Clin. Neurosci.* **26**, E30 (2014).
- 1147 31. Zimmermann, M., Bonaccorso, C., Valerius, C. & Hamann, G. F. [Acute intermittent  
1148 porphyria. A clinical chameleon: case study of a 40-year-old female patient]. *Nervenarzt*  
1149 **77**, 1501–5 (2006).
- 1150 32. Ventura, P. *et al.* A challenging diagnosis for potential fatal diseases: recommendations  
1151 for diagnosing acute porphyrias. *Eur. J. Intern. Med.* **25**, 497–505 (2014).
- 1152 33. Pischik, E. & Kauppinen, R. An update of clinical management of acute intermittent  
1153 porphyria. *Appl. Clin. Genet.* **8**, 201–14 (2015).
- 1154 34. Kumar, B. Acute intermittent porphyria presenting solely with psychosis: a case report  
1155 and discussion. *Psychosomatics* **53**, 494–8 (2012).
- 1156 35. Bonnot, O. *et al.* Diagnostic and treatment implications of psychosis secondary to  
1157 treatable metabolic disorders in adults: a systematic review. *Orphanet J. Rare Dis.* **9**, 65  
1158 (2014).
- 1159 36. Kaback, M. M. & Desnick, R. J. *Hexosaminidase A Deficiency*. *GeneReviews*(®)  
1160 (University of Washington, Seattle, 1993).
- 1161 37. Saleh, O. Late Onset Tay-Sachs Disease Presenting as a Brief Psychotic Disorder with  
1162 Catatonia: A Case Report and Review of Literature.
- 1163 38. Skaper, S. D. in *Brain Protection in Schizophrenia, Mood and Cognitive Disorders* (ed.  
1164 Ritsner, M. S.) 135–165 (Springer Science & Business Media, 2010, 2010).
- 1165 39. Castellano, E. *et al.* RAS signalling through PI3-Kinase controls cell migration via  
1166 modulation of Reelin expression. *Nat. Commun.* **7**, 11245 (2016).
- 1167 40. Gururajan, A. & Buuse, M. van den. Is the mTOR-signalling cascade disrupted in  
1168 Schizophrenia? *J. Neurochem.* **129**, 377–387 (2014).
- 1169 41. Ritsner, M. S. *Brain Protection in Schizophrenia, Mood and Cognitive Disorders*.  
1170 (Springer Science & Business Media, 2010, 2010). doi:10.1007/978-90-481-8553-5
- 1171 42. Enriquez-Barreto, L. & Morales, M. The PI3K signaling pathway as a pharmacological  
1172 target in Autism related disorders and Schizophrenia. *Mol. Cell. Ther.* **4**, 2 (2016).
- 1173 43. Glessner, J. T. *et al.* Strong synaptic transmission impact by copy number variations in  
1174 schizophrenia. *Proc. Natl. Acad. Sci. U. S. A.* **107**, 10584–9 (2010).

- 1175 44. Network and Pathway Analysis Subgroup of Psychiatric Genomics Consortium.  
1176 Psychiatric genome-wide association study analyses implicate neuronal, immune and  
1177 histone pathways. *Nat. Neurosci.* **18**, 199–209 (2015).
- 1178 45. Bauman, A. L. *et al.* Cocaine and antidepressant-sensitive biogenic amine transporters  
1179 exist in regulated complexes with protein phosphatase 2A. *J. Neurosci.* **20**, 7571–8  
1180 (2000).
- 1181 46. He, X. *et al.* Sherlock: detecting gene-disease associations by matching patterns of  
1182 expression QTL and GWAS. *Am J Hum Genet* **92**, 667–680 (2013).
- 1183 47. Ayadi, A. *et al.* Mouse large-scale phenotyping initiatives: overview of the European  
1184 Mouse Disease Clinic (EUMODIC) and of the Wellcome Trust Sanger Institute Mouse  
1185 Genetics Project. *Mamm. Genome* **23**, 600–610 (2012).
- 1186 48. MGI-About the Mouse Genome Informatics database resource. at  
1187 <<http://www.informatics.jax.org/mgihome/projects/aboutmgi.shtml>>
- 1188 49. Keane, T. M. *et al.* Mouse genomic variation and its effect on phenotypes and gene  
1189 regulation. *Nature* **477**, 289–294 (2011).
- 1190 50. About KOMP | IMPC.
- 1191 51. Howe, D. G. *et al.* ZFIN, the Zebrafish Model Organism Database: increased support for  
1192 mutants and transgenics. *Nucleic Acids Res.* **41**, D854–D860 (2013).
- 1193 52. TRANSCRIPTOME PROFILING BY RNA SEQUENCING AND EXON  
1194 MICROARRAY TISSUE ACQUISITION AND QUALIFICATION.
- 1195 53. Watts, D. J. & Strogatz, S. H. Collective dynamics of ‘small-world’ networks. *Nature* **393**,  
1196 440–442 (1998).
- 1197 54. Schork, A. J. *et al.* All SNPs Are Not Created Equal: Genome-Wide Association Studies  
1198 Reveal a Consistent Pattern of Enrichment among Functionally Annotated SNPs. *PLoS*  
1199 *Genet.* **9**, e1003449 (2013).
- 1200 55. Mancuso, N. *et al.* Integrating Gene Expression with Summary Association Statistics to  
1201 Identify Genes Associated with 30 Complex Traits. *Am. J. Hum. Genet.* **100**, 473–487  
1202 (2017).
- 1203 56. Gottlieb, A., Daneshjou, R., DeGorter, M., Montgomery, S. & Altman, R. Population-  
1204 specific imputation of gene expression improves prediction of pharmacogenomic traits for  
1205 African Americans. *bioRxiv* 115451 (2017). doi:10.1101/115451



- 1206 57. Need, A. & Goldstein, D. B. Next generation disparities in human genomics: concerns and  
1207 remedies. *Trends Genet* **25**, 489–94 (2009).
- 1208 58. Popejoy, A. & Fullerton, S. Genomics is failing on diversity. *Nature* **538**, 161–164 (2016).
- 1209 59. Browning, R. in *The Poems of Robert Browning* (eds. Porter, C. & Clarke, H. A.) 257–271  
1210 (Thomas Y. Cromwell and Company, 1896).
- 1211 60. Loftus, L. S. & Arnold, W. N. Vincent van Gogh’s illness: acute intermittent porphyria?  
1212 *BMJ* **303**, 1589–91
- 1213 61. Strik, W. K. [The psychiatric illness of Vincent van Gogh]. *Nervenarzt* **68**, 401–9 (1997).
- 1214 62. Arnold, W. N. The illness of Vincent van Gogh. *J. Hist. Neurosci.* **13**, 22–43 (2004).
- 1215 63. Hughes, J. R. A reappraisal of the possible seizures of Vincent van Gogh. *Epilepsy Behav.*  
1216 **6**, 504–10 (2005).
- 1217 64. Bhattacharyya, K. B. & Rai, S. The neuropsychiatric ailment of Vincent Van Gogh. *Ann.*  
1218 *Indian Acad. Neurol.* **18**, 6–9 (2014).
- 1219 65. Correa, R. Vincent van Gogh: A pathographic analysis. *Med. Hypotheses* **82**, 141–144  
1220 (2014).
- 1221 66. Peters, T. J. & Beveridge, A. The madness of King George III: a psychiatric re-  
1222 assessment. *Hist. Psychiatry* **21**, 20–37 (2010).
- 1223 67. Szatkiewicz, J. P. *et al.* Copy number variation in schizophrenia in Sweden. *Mol.*  
1224 *Psychiatry* **19**, 762–773 (2014).
- 1225 68. Fromer, M. *et al.* De novo mutations in schizophrenia implicate synaptic networks. *Nature*  
1226 **506**, 179–184 (2014).
- 1227 69. Consortium, C.-D. G. of the P. G. Identification of risk loci with shared effects on five  
1228 major psychiatric disorders: a genome-wide analysis. *Lancet* **381**, 1371–1379 (2013).
- 1229 70. Keefe, R. S. E. & Fenton, W. S. How Should DSM-V Criteria for Schizophrenia Include  
1230 Cognitive Impairment? *Schizophr. Bull.* **33**, 912–920 (2007).
- 1231 71. Reichenberg, A. *et al.* Static and Dynamic Cognitive Deficits in Childhood Preceding  
1232 Adult Schizophrenia: A 30-Year Study. *Am. J. Psychiatry* **167**, 160–169 (2010).
- 1233 72. Gold, J. M. Cognitive deficits as treatment targets in schizophrenia. *Schizophr. Res.* **72**,  
1234 21–28 (2004).
- 1235 73. Cannon, M. *et al.* Evidence for Early-Childhood, Pan-Developmental Impairment Specific  
1236 to Schizophreniform Disorder. *Arch. Gen. Psychiatry* **59**, 449 (2002).

- 1237 74. Parikshak, N. N., Gandal, M. J., Geschwind, D. H. & Angeles, L. Systems biology and  
1238 gene networks in neurodevelopmental and neurodegenerative disorders. *Nat. Rev. Genet.*  
1239 **16**, 441–458 (2015).
- 1240 75. Glass, D. *et al.* Gene expression changes with age in skin, adipose tissue, blood and brain.  
1241 *Genome Biol.* **14**, R75 (2013).
- 1242 76. Colantuoni, C. *et al.* Temporal dynamics and genetic control of transcription in the human  
1243 prefrontal cortex. *Nature* **478**, 519–523 (2012).
- 1244 77. Gusev, A. *et al.* Transcriptome-wide association study of schizophrenia and chromatin  
1245 activity yields mechanistic disease insights. *bioRxiv* 67355 (2016). doi:10.1101/067355
- 1246 78. ROSMAP Study - syn3219045. at <<https://www.synapse.org/#!Synapse:syn3219045>>
- 1247 79. NIMH » Human Brain Collection Core (HBCC). at <[https://www.nimh.nih.gov/labs-at-](https://www.nimh.nih.gov/labs-at-nimh/research-areas/research-support-services/hbcc/human-brain-collection-core-hbcc.shtml)  
1248 [nimh/research-areas/research-support-services/hbcc/human-brain-collection-core-](https://www.nimh.nih.gov/labs-at-nimh/research-areas/research-support-services/hbcc/human-brain-collection-core-hbcc.shtml)  
1249 [hbcc.shtml](https://www.nimh.nih.gov/labs-at-nimh/research-areas/research-support-services/hbcc/human-brain-collection-core-hbcc.shtml)>
- 1250 80. Barbeira, A. *et al.* MetaXcan: Summary Statistics Based Gene-Level Association Method  
1251 Infers Accurate PrediXcan Results. *bioRxiv* (2016).
- 1252 81. Ardlie, K. G. *et al.* The Genotype-Tissue Expression (GTEx) pilot analysis: Multitissue  
1253 gene regulation in humans. *Science* (80-. ). **348**, 648–660 (2015).
- 1254 82. Willer, C. J., Li, Y. & Abecasis, G. R. METAL: fast and efficient meta-analysis of  
1255 genomewide association scans. *Bioinformatics* **26**, 2190–2191 (2010).
- 1256 83. COCHRAN, W. G. THE COMPARISON OF PERCENTAGES IN MATCHED  
1257 SAMPLES. *Biometrika* **37**, 256–266 (1950).
- 1258 84. Yang, J., Lee, S. H., Goddard, M. E. & Visscher, P. M. GCTA: a tool for genome-wide  
1259 complex trait analysis. *Am. J. Hum. Genet.* **88**, 76–82 (2011).
- 1260 85. de Leeuw, C. A., Mooij, J. M., Heskes, T. & Posthuma, D. MAGMA: generalized gene-  
1261 set analysis of GWAS data. *PLoS Comput. Biol.* **11**, e1004219 (2015).
- 1262 86. Kirov, G. *et al.* De novo CNV analysis implicates specific abnormalities of postsynaptic  
1263 signalling complexes in the pathogenesis of schizophrenia. *Mol. Psychiatry* **17**, 142–53  
1264 (2012).
- 1265 87. Ashburner, M. *et al.* Gene ontology: tool for the unification of biology. The Gene  
1266 Ontology Consortium. *Nat. Genet.* **25**, 25–29 (2000).
- 1267 88. The Gene Ontology Consortium. Gene Ontology Consortium: going forward. *Nucleic*

- 1268 *Acids Res.* **43**, D1049-1056 (2014).
- 1269 89. Kanehisa, M. & Goto, S. KEGG: kyoto encyclopedia of genes and genomes. *Nucleic*  
1270 *Acids Res.* **28**, 27–30 (2000).
- 1271 90. Croft, D. *et al.* The Reactome pathway knowledgebase. *Nucleic Acids Res.* **42**, D472-7  
1272 (2014).
- 1273 91. Thomas, P. D. *et al.* PANTHER: a library of protein families and subfamilies indexed by  
1274 function. *Genome Res.* **13**, 2129–2141 (2003).
- 1275 92. Mi, H., Muruganujan, A. & Thomas, P. D. PANTHER in 2013: modeling the evolution of  
1276 gene function, and other gene attributes, in the context of phylogenetic trees. *Nucleic*  
1277 *Acids Res.* **41**, D377-86 (2013).
- 1278 93. BioCarta. MSigDB Collections. (2017).
- 1279 94. Miller, J. A. *et al.* Transcriptional landscape of the prenatal human brain. *Nature* **508**,  
1280 199–206 (2014).
- 1281 95. Lin, G. N. *et al.* Spatiotemporal 16p11.2 Protein Network Implicates Cortical Late Mid-  
1282 Fetal Brain Development and KCTD13- Cul3-RhoA Pathway in Psychiatric Diseases.  
1283 *Neuron* **85**, 742–754 (2015).
- 1284 96. Bahl, E., Koomar, T. & Michaelson, J. J. cerebroViz: An R package for anatomical visu-  
1285 alization of spatiotemporal brain data. *Bioinformatics* **33**, btw726 (2016).
- 1286 97. van der Weyden, L., White, J. K., Adams, D. J. & Logan, D. W. The mouse genetics  
1287 toolkit: revealing function and mechanism. *Genome Biol.* **12**, 224 (2011).
- 1288 98. Home | 3i Consortium - Wellcome Trust Sanger Institute. at  
1289 <<http://www.immunophenotype.org/>>
- 1290 99. Mors, O., Perto, G. P. & Mortensen, P. B. The Danish Psychiatric Central Research  
1291 Register. *Scand. J. Public Health* **39**, 54–57 (2011).
- 1292 100. Børglum, A. D. *et al.* Genome-wide study of association and interaction with maternal  
1293 cytomegalovirus infection suggests new schizophrenia loci. *Mol. Psychiatry* **19**, 325–33  
1294 (2014).
- 1295 101. Hollegaard, M. V *et al.* Robustness of genome-wide scanning using archived dried blood  
1296 spot samples as a DNA source. *BMC Genet.* **12**, 58 (2011).
- 1297 102. Illumina. illumina GenCall Data Analysis Software. Illumina Tech Note. (2005). at  
1298 <[https://www.illumina.com/Documents/products/technotes/technote\\_gencall\\_data\\_analysi](https://www.illumina.com/Documents/products/technotes/technote_gencall_data_analysi)

1299 s\_software.pdf>

1300 103. Korn, J. M. *et al.* Integrated genotype calling and association analysis of SNPs, common  
1301 copy number polymorphisms and rare CNVs. *Nat. Genet.* **40**, 1253–60 (2008).

1302 104. Goldstein, J. I. *et al.* zCall: a rare variant caller for array-based genotyping: genetics and  
1303 population analysis. *Bioinformatics* **28**, 2543–2545 (2012).

1304

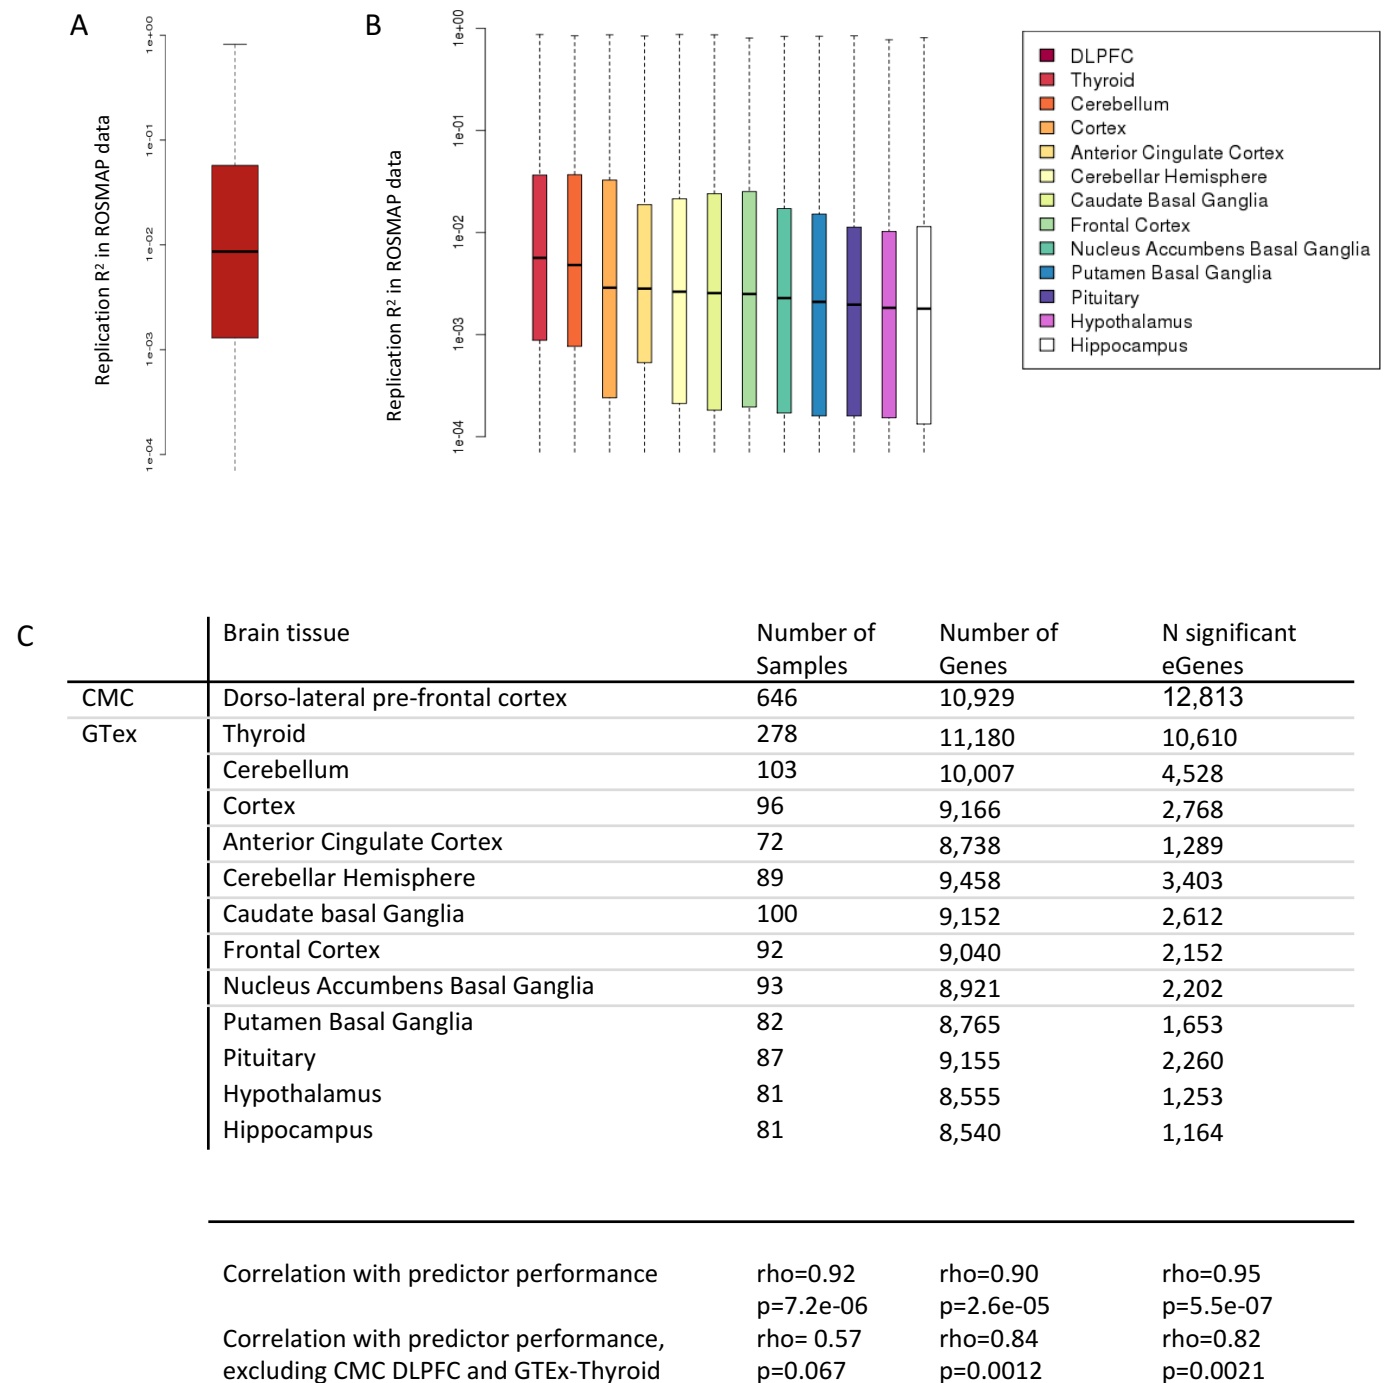

**Figure 1: Replication of DLPFC prediction models in independent data.**

Measured gene expression (ROSMAP RNA-seq) was compared to predicted genetically-regulated gene expression for CMC DLPFC and 12 GTeX predictor databases. Replication  $R^2$  values are significantly higher for the DLPFC than for the 12 GTEX brain expression models.

A. Distribution of  $R_R^2$  values of CMC DLPFC predictors in ROSMAP data. Mean  $R_R^2 = 0.056$ . 47.7% of genes have  $R_R^2 \geq 0.01$ .

B. Distribution of  $R_R^2$  values of 12 GTeX predictors in ROSMAP data.

C. Table of sample sizes and p-val thresholds for CMC DLPFC and GTeX data. Number of samples, number of genes in the prediXcan model and number of eGenes are all significantly correlated with predictor performance in ROSMAP data.

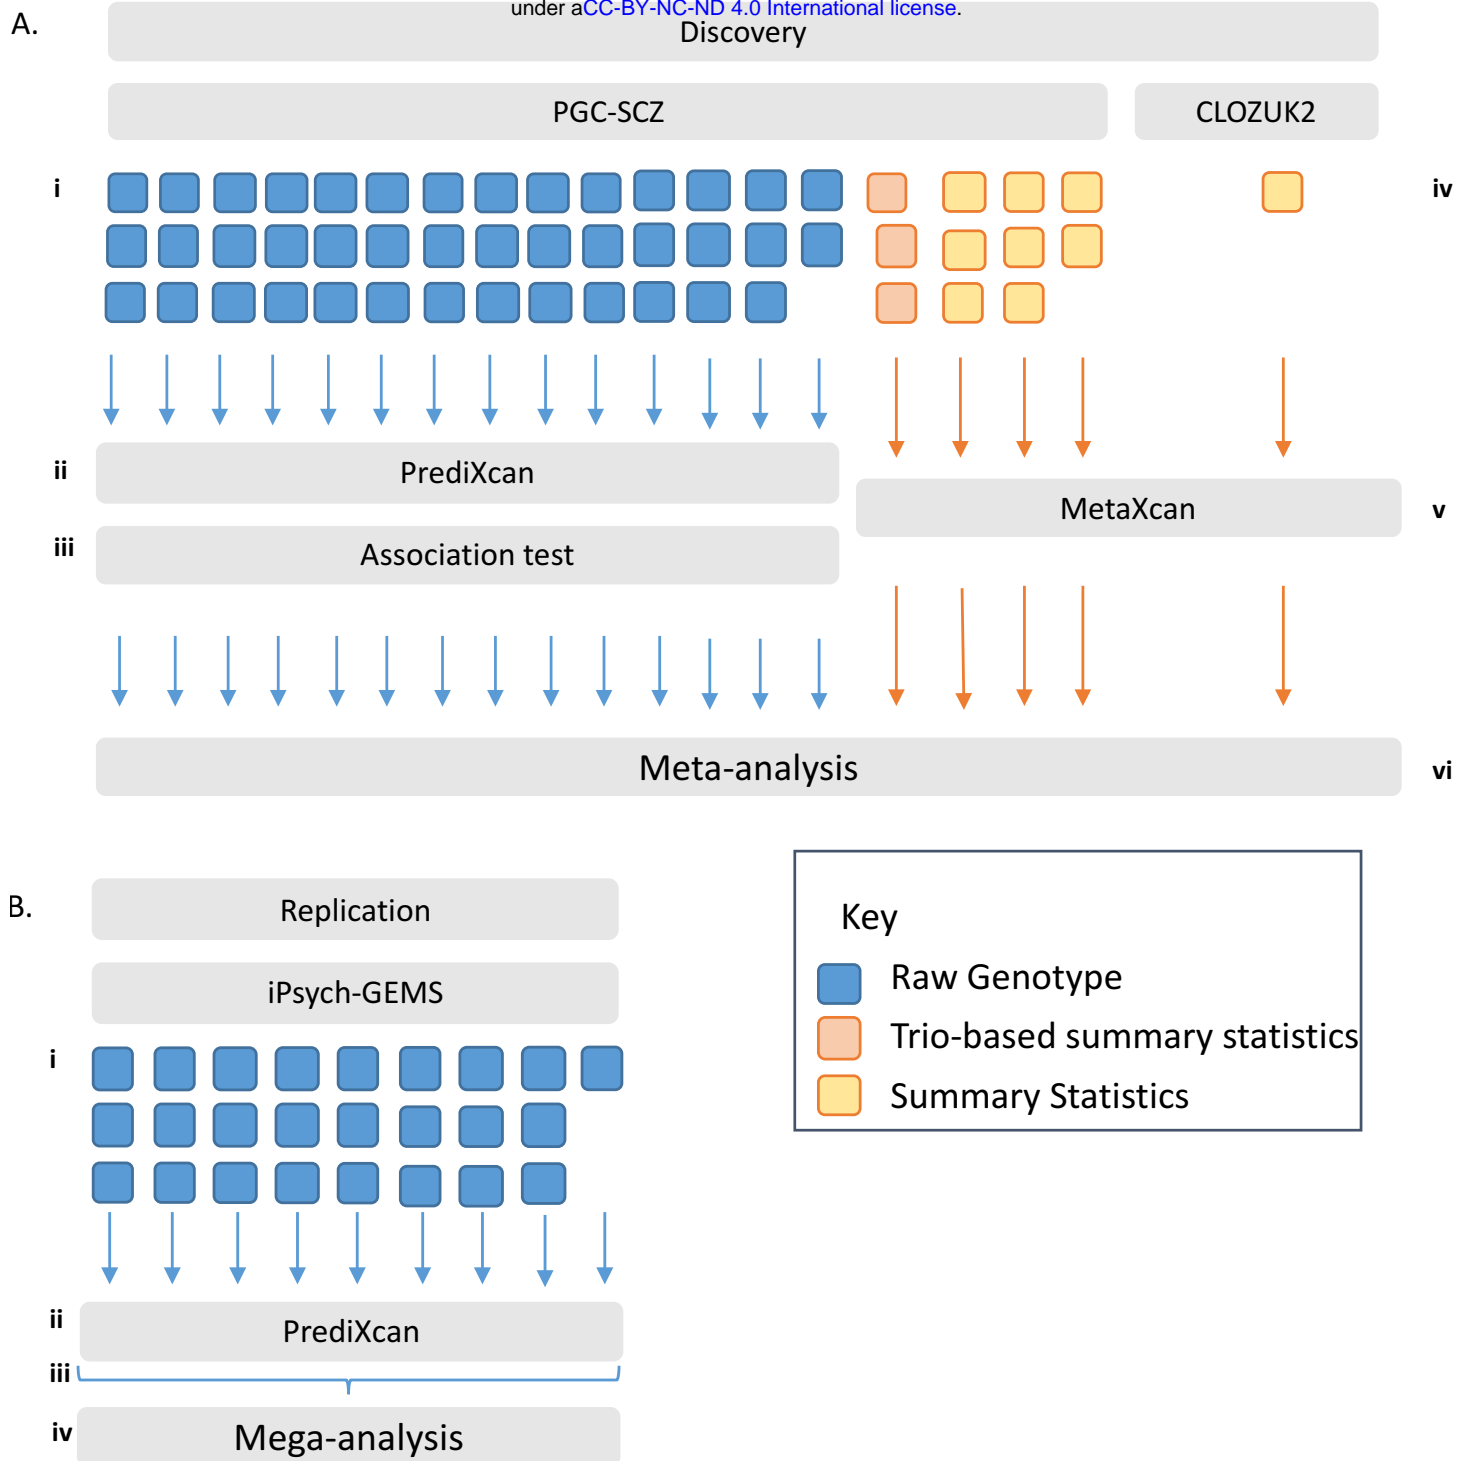

**Figure 2: Analysis outline.**

- A) Discovery Samples. 41 PGC-SCZ cohorts had available raw genotypes (i). Predicted DLPFC gene expression was calculated in each cohort using prediXcan (ii) and tested for association with case-control status (iii). 11 PGC cohorts (3 trio, 8 case-control) and the CLOZUK2 cohort had only summary statistics available (iv). MetaXcan was used to calculate DLPFC associations for each cohort (v). Results were meta-analysed across all 53 cohorts (vi). This procedure was repeated for 12 GTEx prediction models.
- B) Replication Samples. iPSYCH-GEMS samples were collected in 25 waves (i). Predicted DLPFC gene expression was calculated in each wave separately using prediXcan (ii) and merged for association testing (iii). A mega-analysis was run across all 25 waves, using wave membership as a covariate in the regression (iv)

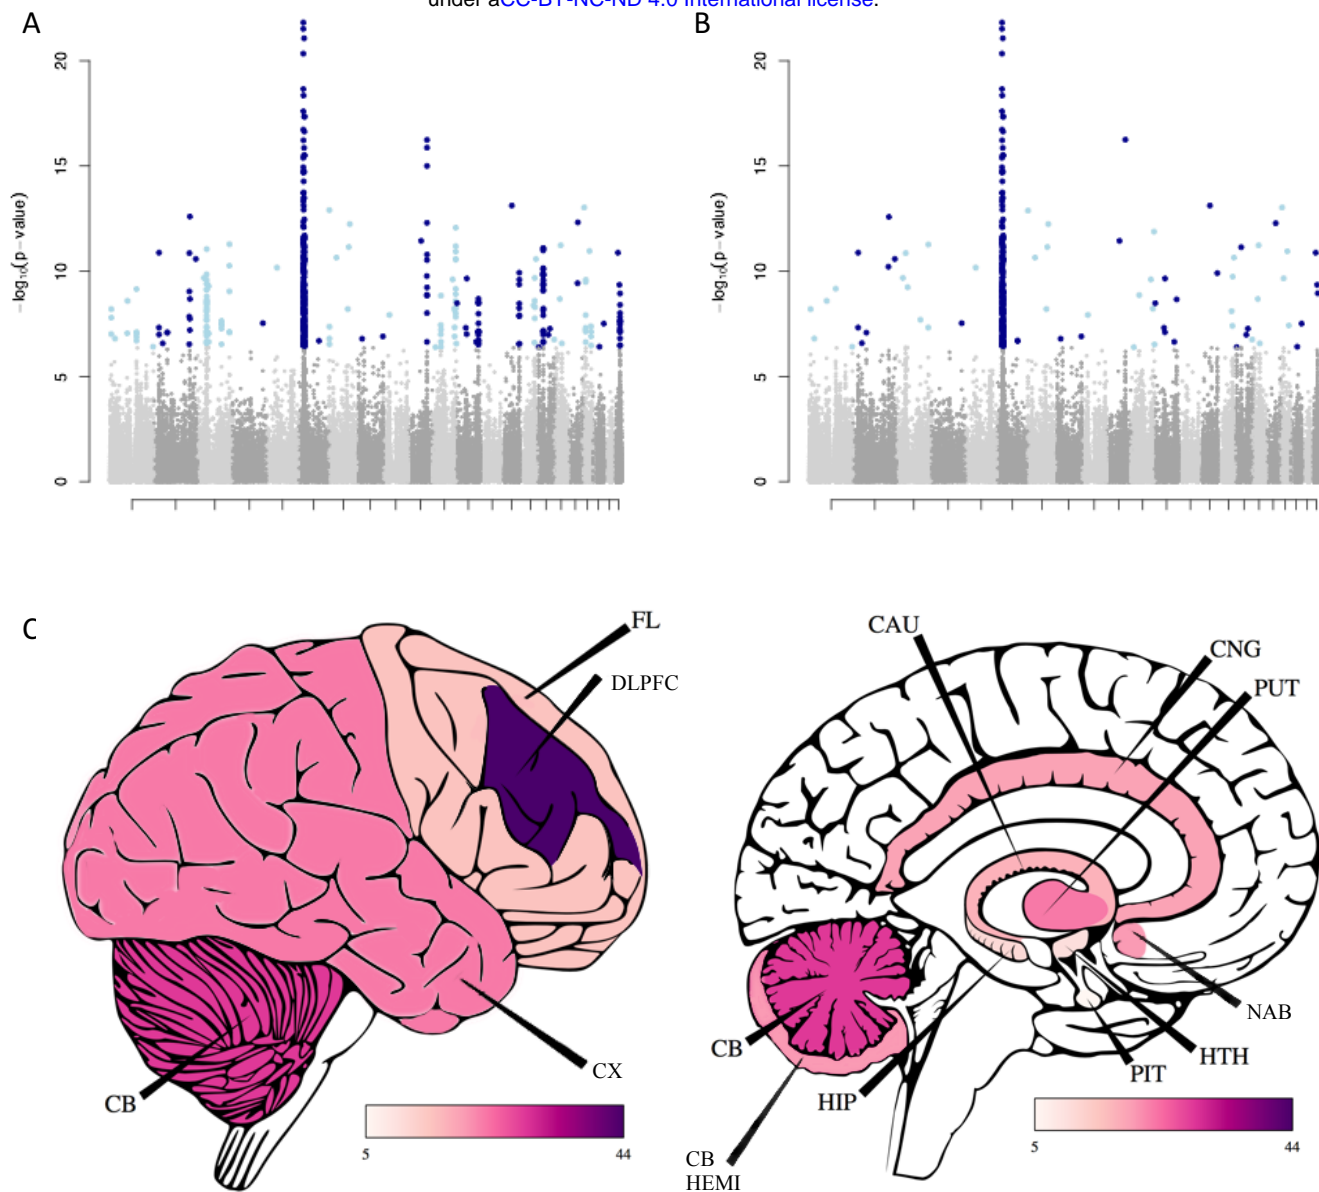

### Figure 3: SCZ associations results

- A) 413 genes are associated with SCZ across 12 brain tissues
- B) 67 genes remain significant outside the MHC after stepwise conditional analysis
- C) Number of genome-wide significant loci, outside the MHC region, identified in each brain region. Abbreviations are as follows; CB- Cerebellum; CX- Cortex; FL- Frontal Cortex; DLPFC- Dorso-lateral pre-frontal cortex; CB HEMI- Cerebellar Hemisphere; HIP- Hippocampus; PIT- Pituitary Gland; HTH- Hypothalamus; NAB- Nucleus Accumbens (Basal Ganglia); PUT- Putamen (Basal Ganglia); CAU- Caudate (Basal Ganglia); CNG- Anterior Cingulate Cortex

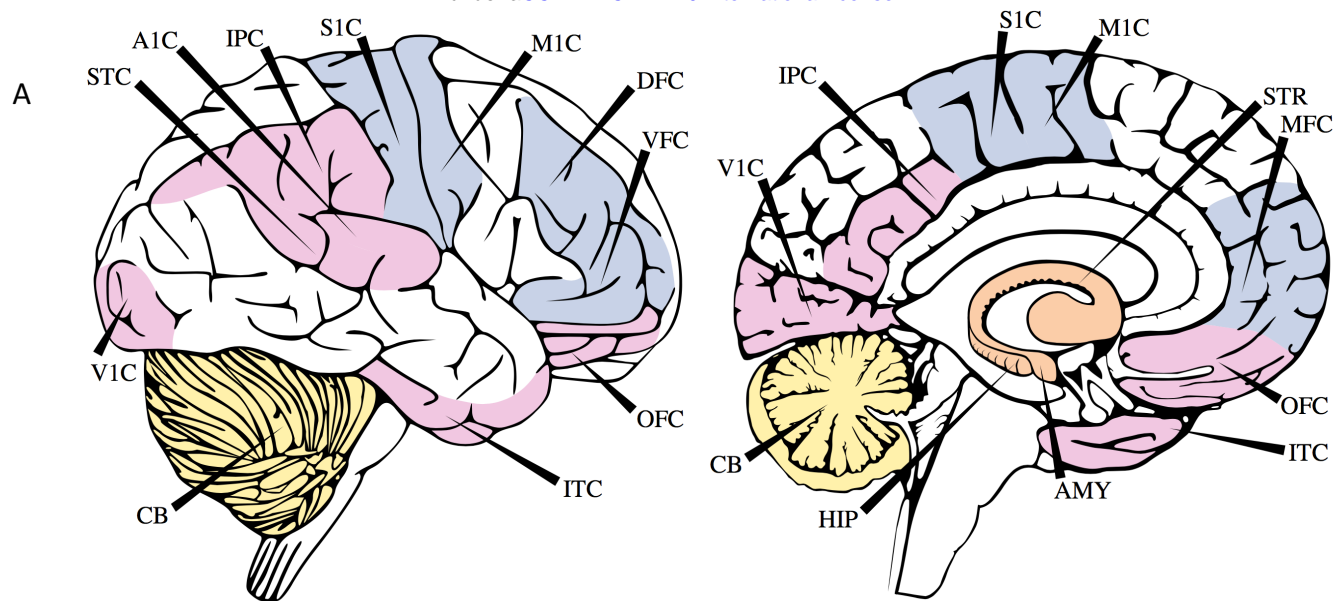

B

### P-values of connectedness

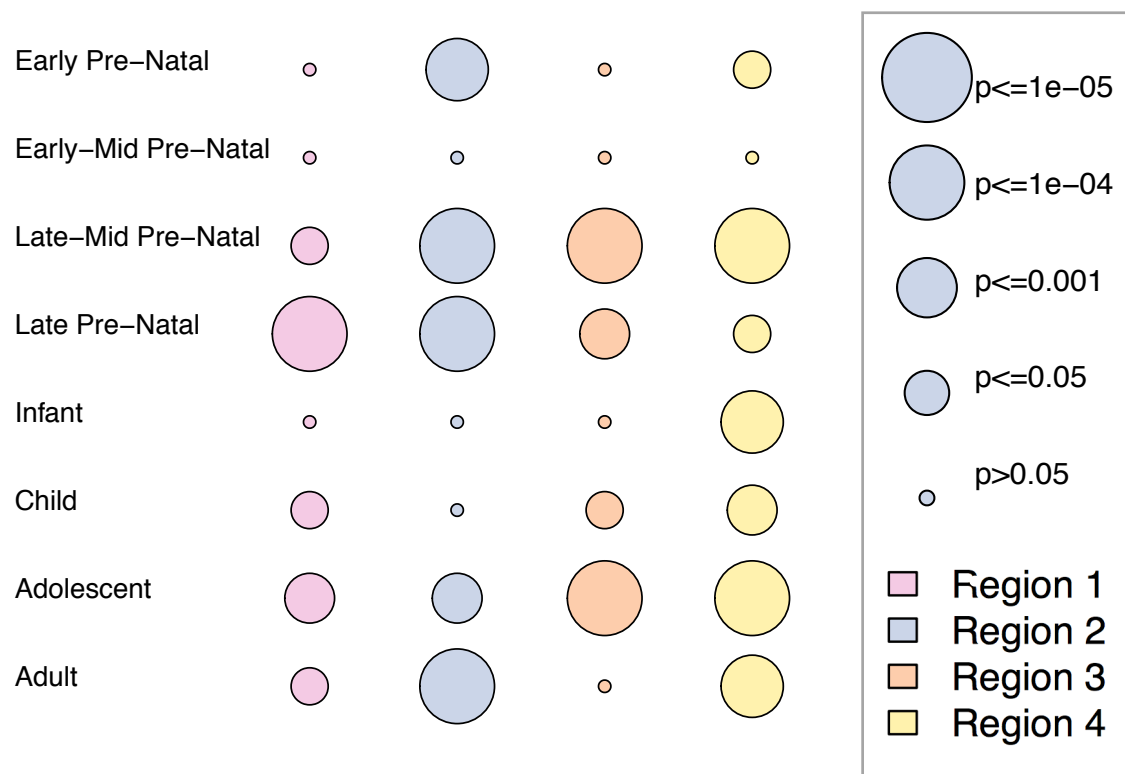

**Figure 4: SCZ-associated genes are co-expressed throughout development and across brain regions**

- A) Brain tissues selected for each of four BRAINSPAN regions. Region 1: IPC, V1C, ITC, OFC, STC, A1C; Region 2: S1C, M1C, DFC, VFC, MFC; Region 3: HIP, AMY, STR; Region 4: CB
- B) Average clustering coefficients were calculated for all pairs of SCZ-associated genes, and compared to permuted gene networks to obtain empirical significance levels.



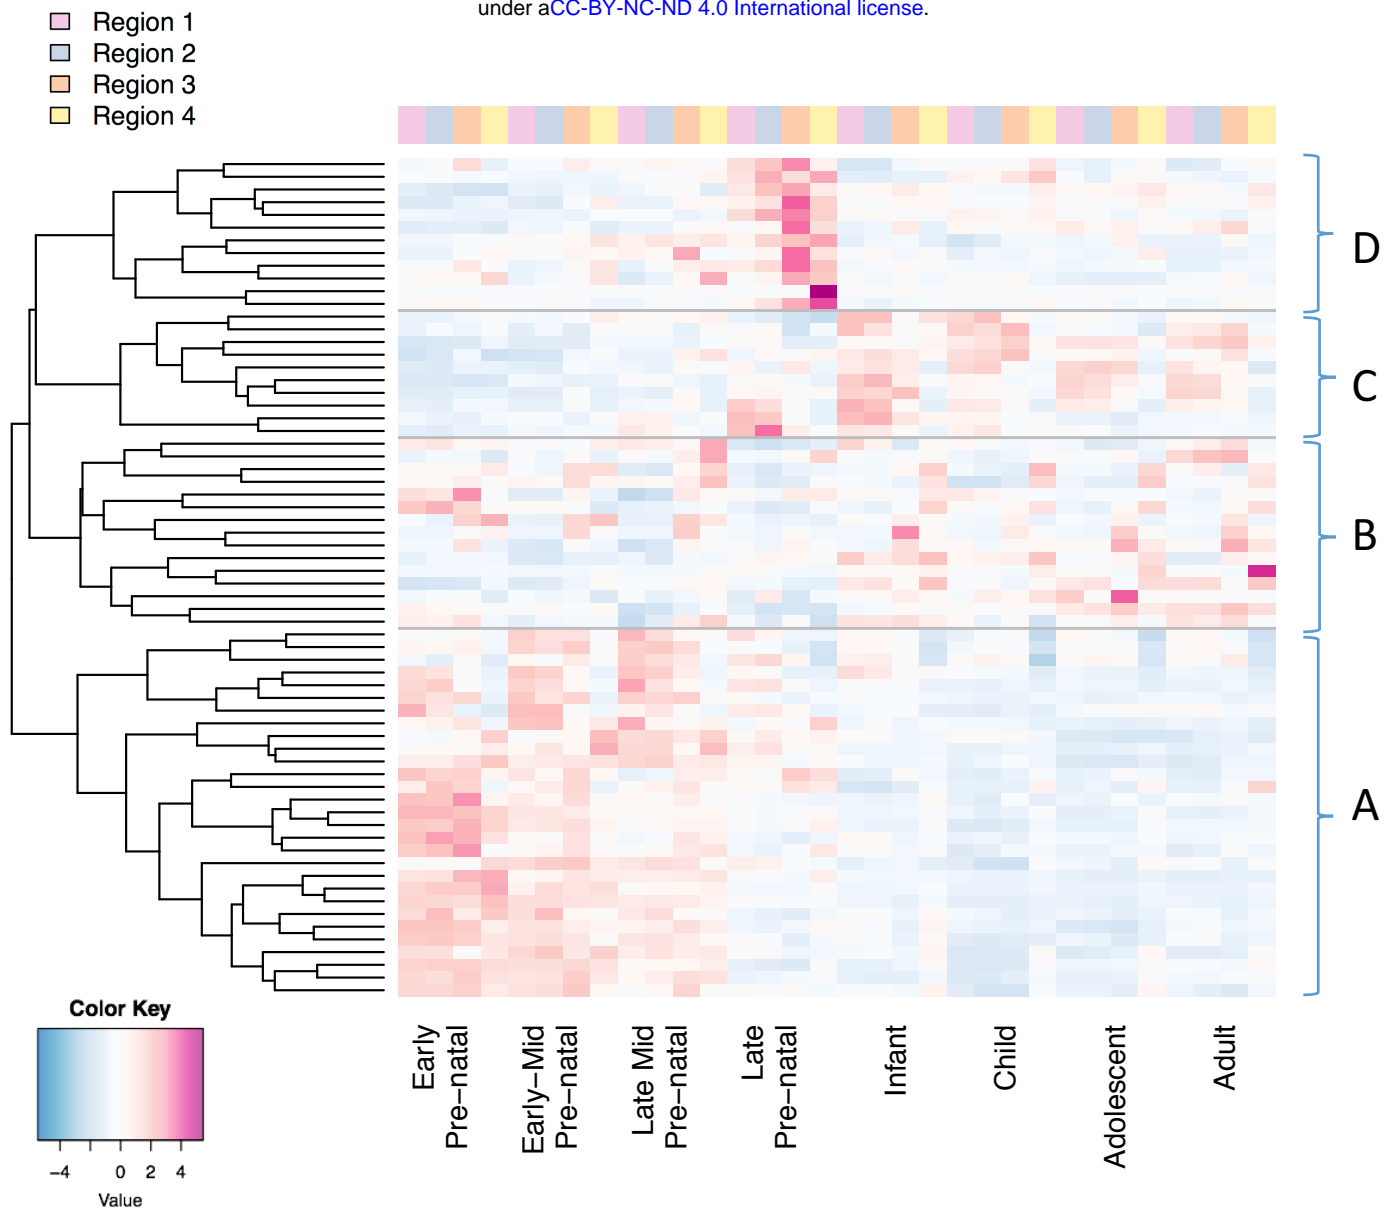

**Figure 5: Gene expression patterns for SCZ-associated genes cluster into four groups, relating to distinct spatiotemporal expression.**

Brain regions are shown in figure 5a.

- 29 genes are expressed in the early-mid pre-natal period (4-24 post-conception weeks)
- 15 genes are expressed throughout development; sub-clusters correspond to either specific expression in region 4, or expression across the brain
- Ten genes are expressed in the late-prenatal (25-38pcw) and post-natal period
- 12 genes are expressed in the late pre-natal period (25-39pcw)

Table 1: SCZ-associated genes

| <i>Gene name</i>          | Tissue              | BETA   | P        | GVAR  | Adjusted BETA | Adjusted OR |
|---------------------------|---------------------|--------|----------|-------|---------------|-------------|
| <i>GNL3</i>               | GTEX Cerebellum     | 0.037  | 1.39E-11 | 0.115 | 0.012         | 1.012       |
| <i>THOC7</i>              | GTEX Cerebellum     | -0.113 | 5.77E-10 | 0.010 | -0.011        | 0.989       |
| <i>NAGA</i>               | GTEX Cerebellum     | 0.122  | 1.12E-09 | 0.009 | 0.011         | 1.011       |
| <i>TAC3</i>               | GTEX Cerebellum     | -0.868 | 8.03E-08 | 0.000 | -0.015        | 0.985       |
| <i>CHRNA2</i>             | GTEX Cerebellum     | -0.016 | 1.63E-07 | 0.395 | -0.010        | 0.990       |
| <i>ACTR5</i>              | GTEX Cerebellum     | 0.208  | 3.88E-07 | 0.019 | 0.029         | 1.029       |
| <i>INO80E</i>             | GTEX Frontal Cortex | 0.130  | 7.25E-12 | 0.009 | 0.012         | 1.013       |
| <i>PLPPR5</i>             | GTEX Frontal Cortex | -0.672 | 2.58E-09 | 0.006 | -0.053        | 0.948       |
| <b><i>FAM205A</i></b>     | GTEX Frontal Cortex | 0.043  | 1.21E-08 | 0.061 | 0.011         | 1.011       |
| <i>AC110781.3</i>         | GTEX Thyroid        | 0.342  | 1.31E-13 | 0.002 | 0.014         | 1.014       |
| <i>IMMP2L</i>             | GTEX Thyroid        | -0.073 | 7.09E-12 | 0.046 | -0.016        | 0.984       |
| <i>IGSF9B</i>             | GTEX Thyroid        | -0.024 | 3.05E-07 | 0.156 | -0.010        | 0.991       |
| <b><i>NMRAL1</i></b>      | GTEX Thyroid        | 0.038  | 4.03E-07 | 0.060 | 0.009         | 1.009       |
| <b><i>HIF1A</i></b>       | CMC DLPPFC          | 11.130 | 7.52E-14 | 0.000 | 0.148         | 1.159       |
| <i>TTMM29</i>             | CMC DLPPFC          | 11.207 | 9.27E-14 | 0.000 | 0.168         | 1.183       |
| <b><i>ST7-014</i></b>     | CMC DLPPFC          | 10.170 | 5.79E-13 | 0.001 | 0.318         | 1.374       |
| <b><i>H2AFY2</i></b>      | CMC DLPPFC          | 10.962 | 3.60E-12 | 0.000 | 0.191         | 1.211       |
| <b><i>STARD3</i></b>      | CMC DLPPFC          | 10.740 | 5.90E-12 | 0.001 | 0.304         | 1.355       |
| <b><i>CTC-471F3.5</i></b> | CMC DLPPFC          | 8.535  | 1.11E-11 | 0.000 | 0.104         | 1.110       |
| <b><i>SF3A1</i></b>       | CMC DLPPFC          | 8.651  | 1.32E-11 | 0.000 | 0.083         | 1.086       |
| <b><i>ZNF512</i></b>      | CMC DLPPFC          | 10.312 | 1.32E-11 | 0.001 | 0.261         | 1.298       |
| <i>FURIN</i>              | CMC DLPPFC          | -0.084 | 2.22E-11 | 0.022 | -0.012        | 0.988       |
| <b><i>INHBA-AS1</i></b>   | CMC DLPPFC          | 8.399  | 2.24E-11 | 0.000 | 0.127         | 1.135       |
| <b><i>SF3B1</i></b>       | CMC DLPPFC          | 0.099  | 6.14E-11 | 0.014 | 0.012         | 1.012       |
| <i>EFTUD1P1</i>           | CMC DLPPFC          | -0.092 | 1.81E-10 | 0.017 | -0.012        | 0.988       |
| <i>MLH1</i>               | CMC DLPPFC          | 2.840  | 2.10E-10 | 0.001 | 0.069         | 1.071       |
| <i>GATAD2A</i>            | CMC DLPPFC          | -0.044 | 2.18E-10 | 0.071 | -0.012        | 0.988       |
| <i>METTL1</i>             | CMC DLPPFC          | 9.357  | 2.23E-10 | 0.000 | 0.166         | 1.181       |

|                       |             |                                        |        |          |       |        |       |
|-----------------------|-------------|----------------------------------------|--------|----------|-------|--------|-------|
| <i>DMC1</i>           | CMC         | DLPFC                                  | 7.229  | 4.48E-10 | 0.000 | 0.130  | 1.139 |
| <b><i>RAD51D</i></b>  | <b>CMC</b>  | <b>DLPFC</b>                           | 7.612  | 2.11E-09 | 0.000 | 0.111  | 1.117 |
| <i>RERE</i>           | CMC         | DLPFC                                  | 2.847  | 6.32E-09 | 0.000 | 0.036  | 1.037 |
| <i>PCCB</i>           | CMC         | DLPFC                                  | -0.044 | 2.05E-08 | 0.054 | -0.010 | 0.990 |
| <i>CLCN3</i>          | CMC         | DLPFC                                  | 0.141  | 2.96E-08 | 0.005 | 0.010  | 1.010 |
| <b><i>ATG101</i></b>  | <b>CMC</b>  | <b>DLPFC</b>                           | 8.086  | 4.90E-08 | 0.007 | 0.695  | 2.005 |
| <i>JRK</i>            | CMC         | DLPFC                                  | 0.032  | 1.25E-07 | 0.091 | 0.010  | 1.010 |
| <i>PTPRU</i>          | CMC         | DLPFC                                  | -0.077 | 1.60E-07 | 0.016 | -0.010 | 0.990 |
| <b><i>MARCKS</i></b>  | <b>CMC</b>  | <b>DLPFC</b>                           | 0.398  | 2.05E-07 | 0.001 | 0.015  | 1.015 |
| <i>TCF4</i>           | GTEX        | Anterior Cingulate Cortex              | -0.059 | 5.22E-13 | 0.051 | -0.013 | 0.987 |
| <i>DGKD</i>           | GTEX        | Anterior Cingulate Cortex              | -0.937 | 2.63E-11 | 0.001 | -0.022 | 0.979 |
| <i>CIQTNF4</i>        | GTEX        | Anterior Cingulate Cortex              | -0.173 | 1.37E-09 | 0.010 | -0.017 | 0.983 |
| <i>PITPN4</i>         | GTEX        | Anterior Cingulate Cortex              | -0.243 | 1.77E-07 | 0.002 | -0.010 | 0.990 |
| <i>FXR1</i>           | GTEX        | Caudate Basal Ganglia                  | 0.439  | 5.40E-12 | 0.001 | 0.017  | 1.017 |
| <i>ZDHHCl</i>         | GTEX        | Caudate Basal Ganglia                  | 0.354  | 5.36E-08 | 0.001 | 0.011  | 1.012 |
| <i>PDE4D</i>          | GTEX        | Cerebellar Hemisphere                  | 0.365  | 6.81E-11 | 0.001 | 0.013  | 1.013 |
| <i>DRD2</i>           | GTEX        | Cerebellar Hemisphere                  | -0.182 | 2.47E-10 | 0.004 | -0.012 | 0.988 |
| <i>PITPNM2</i>        | GTEX        | Cerebellar Hemisphere                  | -0.065 | 2.21E-09 | 0.028 | -0.011 | 0.989 |
| <i>RINT1</i>          | GTEX        | Cerebellar Hemisphere                  | 0.086  | 6.32E-09 | 0.016 | 0.011  | 1.011 |
| <i>SRMS</i>           | GTEX        | Cerebellar Hemisphere                  | -0.440 | 3.08E-08 | 0.001 | -0.011 | 0.989 |
| <i>SETD6</i>          | GTEX        | Cerebellar Hemisphere                  | -0.043 | 1.05E-07 | 0.054 | -0.010 | 0.990 |
| <i>APOPT1</i>         | GTEX        | Cortex                                 | -0.074 | 1.24E-10 | 0.026 | -0.012 | 0.988 |
| <i>VSIG2</i>          | GTEX        | Cortex                                 | -0.092 | 6.01E-09 | 0.013 | -0.011 | 0.989 |
| <i>SDCC4G8</i>        | GTEX        | Cortex                                 | -0.069 | 3.88E-07 | 0.002 | -0.003 | 0.997 |
| <b><i>PIK3C2A</i></b> | <b>GTEX</b> | <b>Cortex</b>                          | -0.040 | 4.04E-07 | 0.365 | -0.024 | 0.976 |
| <i>ASS3MT</i>         | GTEX        | Frontal Cortex                         | 0.594  | 5.65E-17 | 0.001 | 0.017  | 1.017 |
| <b><i>FOXN2</i></b>   | <b>GTEX</b> | <b>Hippocampus</b>                     | -0.250 | 2.65E-07 | 0.021 | -0.036 | 0.964 |
| <b><i>RASIP1</i></b>  | <b>GTEX</b> | <b>Nucleus Accumbens Basal Ganglia</b> | 0.055  | 3.80E-08 | 0.034 | 0.010  | 1.010 |
| <b><i>TCF23</i></b>   | <b>GTEX</b> | <b>Nucleus Accumbens Basal Ganglia</b> | -0.076 | 4.83E-08 | 0.019 | -0.010 | 0.990 |
| <i>TTCl4</i>          | GTEX        | <b>Nucleus Accumbens Basal Ganglia</b> | -0.089 | 4.84E-08 | 0.013 | -0.010 | 0.990 |
| <i>TYW5</i>           | GTEX        | Putamen Basal Ganglia                  | -0.080 | 2.63E-13 | 0.035 | -0.015 | 0.985 |

|                      |             |                       |        |          |       |        |       |
|----------------------|-------------|-----------------------|--------|----------|-------|--------|-------|
| <i>SNX19</i>         | GTEX        | Putamen Basal Ganglia | 0.031  | 1.31E-12 | 0.179 | 0.013  | 1.013 |
| <i>CIART</i>         | GTEX        | Putamen Basal Ganglia | 0.090  | 6.78E-10 | 0.017 | 0.012  | 1.012 |
| <i>SH2D7</i>         | GTEX        | Putamen Basal Ganglia | 0.096  | 7.89E-09 | 0.013 | 0.011  | 1.011 |
| <b><i>DGUOK</i></b>  | <b>GTEX</b> | Putamen Basal Ganglia | 0.255  | 8.26E-08 | 0.002 | 0.011  | 1.011 |
| <i>CI2orf76</i>      | GTEX        | Putamen Basal Ganglia | 0.031  | 2.27E-07 | 0.095 | 0.010  | 1.010 |
| <b><i>LRR374</i></b> | <b>GTEX</b> | Putamen Basal Ganglia | -0.035 | 2.69E-07 | 0.076 | -0.010 | 0.991 |
| <i>AC005841.1</i>    | GTEX        | Pituitary             | 0.162  | 3.28E-09 | 0.005 | 0.011  | 1.011 |
| <i>RPS17</i>         | GTEX        | Pituitary             | 0.035  | 4.03E-08 | 0.082 | 0.010  | 1.010 |

MHC Region:

|                |      |                                 |            |            |  |  |  |
|----------------|------|---------------------------------|------------|------------|--|--|--|
| <i>BTNL1A1</i> | GTEX | Caudate Basal Ganglia           | -0.2606    | 1.6666E-22 |  |  |  |
| <i>VARS2</i>   | GTEX | Anterior Cingulate Cortex       | 0.0747019  | 7.4821E-15 |  |  |  |
| <i>HST1H3H</i> | GTEX | Putamen Basal Ganglia           | -1.105982  | 3.2236E-10 |  |  |  |
| <i>NUDT3</i>   | GTEX | Nucleus Accumbens Basal Ganglia | 0.10378753 | 6.546E-09  |  |  |  |

**Table 2: Significantly enriched pathways and gene sets**

| Analysis          | Gene Set                                                                     | Comp P                  | FDR P                   |
|-------------------|------------------------------------------------------------------------------|-------------------------|-------------------------|
| Hypothesis driven | FMRP-targets                                                                 | 1.96x10 <sup>-08</sup>  | 3.097x10 <sup>-06</sup> |
|                   | BP denovo CNV                                                                | 7.92x10 <sup>-08</sup>  | 6.257x10 <sup>-06</sup> |
|                   | HIGH LOF intolerant                                                          | 5.86x10 <sup>-05</sup>  | 0.00309                 |
| Agnostic          | Increased spleen iron level                                                  | 2.72x10 <sup>-08</sup>  | 0.000245                |
|                   | Decreased IgM level                                                          | 6.80x10 <sup>-07</sup>  | 0.00307                 |
|                   | Condensed chromosome                                                         | 1.99x10 <sup>-06</sup>  | 0.00598                 |
|                   | Chromosome                                                                   | 2.80x10 <sup>-06</sup>  | 0.00632                 |
|                   | Abnormal spleen iron level                                                   | 6.79x10 <sup>-06</sup>  | 0.00765                 |
|                   | Mitotic Anaphase                                                             | 6.39 x10 <sup>-06</sup> | 0.00765                 |
|                   | Mitotic Metaphase and Anaphase                                               | 5.13 x10 <sup>-06</sup> | 0.00765                 |
|                   | Resolution of Sister Chromatid Cohesion                                      | 5.82 x10 <sup>-06</sup> | 0.00765                 |
|                   | Increased liver iron level                                                   | 1.03 x10 <sup>-05</sup> | 0.0103                  |
|                   | Separation of Sister Chromatids                                              | 1.28 x10 <sup>-05</sup> | 0.0115                  |
|                   | Regulation of Rab GTPase activity                                            | 1.78 x10 <sup>-05</sup> | 0.0123                  |
|                   | Regulation of Rab protein signal transduction                                | 1.78 x10 <sup>-05</sup> | 0.0123                  |
|                   | Protein phosphorylated amino acid binding                                    | 1.75x10 <sup>-05</sup>  | 0.0123                  |
|                   | Chromosome                                                                   | 2.57x10 <sup>-05</sup>  | 0.0165                  |
|                   | Hexosaminidase activity                                                      | 3.47x10 <sup>-05</sup>  | 0.0174                  |
|                   | Abnormal learningmemoryconditioning                                          | 3.11x10 <sup>-05</sup>  | 0.0174                  |
|                   | Abnormal liver iron level                                                    | 3.47x10 <sup>-05</sup>  | 0.0174                  |
|                   | Mitotic Prometaphase                                                         | 2.99x10 <sup>-05</sup>  | 0.0174                  |
|                   | M Phase                                                                      | 3.70x10 <sup>-05</sup>  | 0.0176                  |
|                   | Positive regulation of Rab GTPase activity                                   | 5.93x10 <sup>-05</sup>  | 0.0232                  |
|                   | Rab GTPase activator activity                                                | 5.93x10 <sup>-05</sup>  | 0.0232                  |
|                   | Protein phosphatase type 2A regulator activity                               | 5.24x10 <sup>-05</sup>  | 0.0232                  |
|                   | Replicative senescence                                                       | 5.44x10 <sup>-05</sup>  | 0.0232                  |
|                   | Condensed nuclear chromosome                                                 | 7.11x10 <sup>-05</sup>  | 0.0267                  |
|                   | Ubiquitin-specific protease activity                                         | 0.000104                | 0.0335                  |
|                   | Ras GTPase activator activity                                                | 9.61x10 <sup>-05</sup>  | 0.0335                  |
|                   | Metabolism of porphyrins                                                     | 0.000103                | 0.0335                  |
|                   | Kinetochores                                                                 | 0.000103                | 0.0335                  |
|                   | Decreased physiological sensitivity to xenobiotic                            | 0.000127                | 0.0381                  |
|                   | Antigen Activates B Cell Receptor Leading to Generation of Second Messengers | 0.000124                | 0.0381                  |
|                   | Phosphoprotein binding                                                       | 0.000146                | 0.0424                  |
|                   | Abnormal dorsal-ventral axis patterning                                      | 0.000152                | 0.0429                  |
